# Supplementary material for: Toggling the Z-type interaction off-on in nickel-boron dihydrogen and anionic hydride complexes
Source: Royal Society of Chemistry journal article supplement (doi:10.1039/d2cc03219h), 2022-01-01
Supplement: d2cc03219h1.pdf [file d2cc03219h1.pdf]

## Electronic Supplementary Information

for

### Toggling the Z-Type Interaction Off-On in Nickel-Boron Dihydrogen and Anionic Hydride Complexes

Jacob R. Prat,<sup>a</sup> Ryan C. Cammarota,<sup>a</sup> Brendan J. Graziano,<sup>a</sup> James T. Moore,<sup>a</sup> and Connie C. Lu<sup>a,b,\*</sup>

<sup>a</sup>Department of Chemistry, University of Minnesota, 207 Pleasant Street SE, Minneapolis, Minnesota 55455-0431, United States.

<sup>b</sup>Institute of Inorganic Chemistry, University of Bonn, Gerhard-Domagk-Str. 1, 53121 Bonn, Germany

\*e-mail: [clu@uni-bonn.de](mailto:clu@uni-bonn.de)

## Table of Contents

|                                                                                                                                                                                                                   |     |
|-------------------------------------------------------------------------------------------------------------------------------------------------------------------------------------------------------------------|-----|
| <i>General Considerations</i> .....                                                                                                                                                                               | S1  |
| Synthesis of $(\text{N}_2)\text{NiB}(\text{N}(\text{o}-(\text{NCH}_2\text{P}^i\text{Pr}_2)\text{C}_6\text{H}_4)_3)$ , <b>1-N<sub>2</sub></b> .....                                                                | S2  |
| Synthesis of $\text{NiB}(\text{N}(\text{o}-(\text{NCH}_2\text{P}^i\text{Pr}_2)\text{C}_6\text{H}_4)_3)$ , <b>1</b> .....                                                                                          | S2  |
| <i>In situ</i> synthesis of $(\text{H}_2)\text{NiB}(\text{N}(\text{o}-(\text{NCH}_2\text{P}^i\text{Pr}_2)\text{C}_6\text{H}_4)_3)$ , <b>1-H<sub>2</sub></b> .....                                                 | S2  |
| Synthesis of $[\text{K}([2.2.2]\text{-crypt})][\text{HNiB}(\text{N}(\text{o}-(\text{NCH}_2\text{P}^i\text{Pr}_2)\text{C}_6\text{H}_4)_3)]$ , $[(\text{K}[2.2.2]\text{Crypt})^+]\text{1-H}^-$ .....                | S3  |
| <b>Figure S1:</b> $^1\text{H}\{^{31}\text{P}\}$ NMR spectrum (400 MHz, $\text{C}_6\text{D}_6$ ) of <b>1-N<sub>2</sub></b> .....                                                                                   | S4  |
| <b>Figure S2:</b> $^{31}\text{P}\{^1\text{H}\}$ NMR spectrum (162 MHz, $\text{C}_6\text{D}_6$ ) of <b>1-N<sub>2</sub></b> .....                                                                                   | S4  |
| <b>Figure S3:</b> $^{11}\text{B}$ NMR spectrum (128 MHz, $\text{C}_6\text{D}_6$ ) of <b>1-N<sub>2</sub></b> .....                                                                                                 | S4  |
| <b>Figure S4:</b> $^{31}\text{P}\{^1\text{H}\}$ NMR spectrum (162 MHz, $\text{C}_6\text{D}_6$ ) of <b>1</b> under 1 atm of argon.....                                                                             | S5  |
| <b>Figure S5:</b> $^1\text{H}$ NMR spectrum (400 MHz, $\text{C}_6\text{D}_6$ ) of <b>1</b> under 1 atm of argon.....                                                                                              | S5  |
| <b>Figure S6:</b> $^{11}\text{B}$ NMR spectrum (128 MHz, $\text{C}_6\text{D}_6$ ) of <b>1</b> under 1 atm of argon.....                                                                                           | S5  |
| <b>Figure S7:</b> $^1\text{H}$ NMR spectrum (400 MHz, $\text{C}_6\text{D}_6$ ) of <b>1-H<sub>2</sub></b> under 1 atm of $\text{H}_2$ .....                                                                        | S6  |
| <b>Figure S8:</b> $^{31}\text{P}\{^1\text{H}\}$ NMR spectrum (162 MHz, $\text{C}_6\text{D}_6$ ) of <b>1-H<sub>2</sub></b> under 1 atm of $\text{H}_2$ .....                                                       | S6  |
| <b>Figure S9:</b> $^{11}\text{B}$ NMR spectrum (128 MHz, $\text{C}_6\text{D}_6$ ) of <b>1-H<sub>2</sub></b> under 1 atm of $\text{H}_2$ .....                                                                     | S6  |
| <b>Figure S10:</b> $^1\text{H}$ NMR spectrum (400 MHz, THF- <i>d</i> <sub>8</sub> ) of $[(\text{K}[2.2.2]\text{Crypt})^+]\text{1-H}^-$ .....                                                                      | S7  |
| <b>Figure S11:</b> $^1\text{H}\{^{31}\text{P}\}$ NMR spectrum (400 MHz, THF- <i>d</i> <sub>8</sub> ) of $[(\text{K}[2.2.2]\text{Crypt})^+]\text{1-H}^-$ .....                                                     | S7  |
| <b>Figure S12:</b> $^1\text{H}\{^{11}\text{B}\}$ NMR spectrum (400 MHz, THF- <i>d</i> <sub>8</sub> ) of $[(\text{K}[2.2.2]\text{Crypt})^+]\text{1-H}^-$ .....                                                     | S7  |
| <b>Figure S13:</b> $^{31}\text{P}\{^1\text{H}\}$ NMR spectrum (168 MHz, THF- <i>d</i> <sub>8</sub> ) of $[(\text{K}[2.2.2]\text{Crypt})^+]\text{1-H}^-$ .....                                                     | S8  |
| <b>Figure S14:</b> $^{11}\text{B}$ NMR spectrum (128 MHz, THF- <i>d</i> <sub>8</sub> ) of $[(\text{K}[2.2.2]\text{Crypt})^+]\text{1-H}^-$ .....                                                                   | S8  |
| <b>Figure S15:</b> $^{11}\text{B}\{^1\text{H}\}$ NMR spectrum (128 MHz, THF- <i>d</i> <sub>8</sub> ) of $[(\text{K}[2.2.2]\text{Crypt})^+]\text{1-H}^-$ .....                                                     | S8  |
| <b>Table S1:</b> Crystallographic metrics for <b>1</b> , <b>1-N<sub>2</sub></b> , and <b>1-H<sup>-</sup></b> .....                                                                                                | S9  |
| <b>Table S2:</b> Selected torsion metrics and geometric indices <sup>26-28</sup> for <b>1</b> , <b>1-N<sub>2</sub></b> , and <b>1-H<sup>-</sup></b> .....                                                         | S9  |
| <b>Table S3:</b> Crystallographic bond metrics (Å) and angles (°) for <b>1</b> , <b>1-N<sub>2</sub></b> , and <b>1-H<sup>-</sup></b> .....                                                                        | S10 |
| <b>Figure S16:</b> Variable temperature $^{31}\text{P}\{^1\text{H}\}$ NMR spectra (128 MHz, toluene- <i>d</i> <sub>8</sub> ) of <b>1-H<sub>2</sub></b> under 1 atm $\text{H}_2$ .....                             | S11 |
| <b>Figure S17:</b> Variable temperature $^{31}\text{P}\{^1\text{H}\}$ NMR spectra (128 MHz, THF- <i>d</i> <sub>8</sub> ) of <b>1-H<sub>2</sub></b> under 1 atm $\text{H}_2$ .....                                 | S11 |
| <i>Determination of <math>K_{\text{H}_2}</math> via <math>^{31}\text{P}</math> NMR spectra</i> .....                                                                                                              | S13 |
| <b>Figure S18:</b> Variable temperature $^{31}\text{P}\{^1\text{H}\}$ NMR spectrum (128 MHz, toluene- <i>d</i> <sub>8</sub> ) of <b>1-N<sub>2</sub></b> under 1 atm $\text{N}_2$ .....                            | S12 |
| <b>Figure S19:</b> The equilibria between <b>1</b> and <b>1-H<sub>2</sub></b> .....                                                                                                                               | S13 |
| <b>Figure S20:</b> Variable temperature $^1\text{H}$ NMR spectra of <b>1-H<sub>2</sub></b> dissolved in toluene- <i>d</i> <sub>8</sub> under 4 atm $\text{H}_2$ .....                                             | S14 |
| <b>Figure S21:</b> Variable temperature $^{31}\text{P}$ NMR spectra of <b>1-H<sub>2</sub></b> dissolved in toluene- <i>d</i> <sub>8</sub> under 4 atm $\text{H}_2$ .....                                          | S14 |
| <b>Figure S22:</b> UV-Vis spectra of <b>1</b> under in THF under 1 atm Ar.....                                                                                                                                    | S15 |
| <b>Figure S23:</b> Variable temperature $^1\text{H}$ NMR (400 MHz, THF- <i>d</i> <sub>8</sub> ) T <sub>1</sub> determination of the hydrogen ligand of <b>1-H<sub>2</sub></b> under 1 atm $\text{H}_2$ .....      | S15 |
| <b>Figure S24:</b> $^1\text{H}$ NMR spectrum (400 MHz, THF- <i>d</i> <sub>8</sub> ) of <b>1</b> under 1 atm HD.....                                                                                               | S16 |
| <b>Figure S25:</b> The van't Hoff plot of <b>1-H<sub>2</sub></b> from the NMR spectrum in THF- <i>d</i> <sub>8</sub> at elevated temperatures.....                                                                | S17 |
| <b>Table S4:</b> Comparison of the $\text{H}_2$ activation parameters for the $\text{H}_2$ or HD adducts of the NiML series, where M = B ( <b>1</b> ), Al ( <b>2</b> ), Ga ( <b>3</b> ), and In ( <b>4</b> )..... | S17 |
| <b>Figure S26:</b> The van't Hoff plot of <b>1-N<sub>2</sub></b> from the NMR spectrum in toluene- <i>d</i> <sub>8</sub> at elevated temperatures.....                                                            | S18 |

|                                                                                                                                                                                                                                                                      |     |
|----------------------------------------------------------------------------------------------------------------------------------------------------------------------------------------------------------------------------------------------------------------------|-----|
| <b>Figure S27:</b> The van't Hoff plot of <b>1-H<sub>2</sub></b> from the NMR spectrum in toluene- <i>d</i> <sub>8</sub> at elevated temperatures.....                                                                                                               | S18 |
| <b>Figure S28:</b> Cyclic voltammogram of <b>1</b> .....                                                                                                                                                                                                             | S19 |
| <b>Table S5:</b> Comparison of the electrochemical [NiML] <sup>0/+</sup> and [NiML] <sup>-/0</sup> redox potentials (V vs. Fc <sup>+/0</sup> ) and <sup>31</sup> P NMR shifts (ppm) of NiLH <sub>3</sub> , <b>1</b> , <b>2</b> , <b>3</b> , and <b>4</b> in THF..... | S19 |
| <b>Figure S29:</b> A representative example of the H <sub>2</sub> heterolysis reaction of <b>1-H<sub>2</sub></b> and P <sup>4</sup> Bu in THF- <i>d</i> <sub>8</sub> .....                                                                                           | S20 |
| <b>Figure S30:</b> The observed reaction of <b>1</b> and [PPN][ <b>2-H<sup>-</sup></b> ] in THF- <i>d</i> <sub>8</sub> over the span of three days resulting in no production of <b>1-H<sup>-</sup></b> .....                                                        | S21 |
| <b>Figure S31:</b> The <sup>31</sup> P NMR spectra of the reaction of <b>1-N<sub>2</sub></b> and 1 equiv NaHB <sup>s</sup> Bu <sub>3</sub> in THF- <i>d</i> <sub>8</sub> .....                                                                                       | S21 |
| <b>Figure S32:</b> The <sup>1</sup> H NMR spectra of the reaction of <b>1-N<sub>2</sub></b> and 1 equiv NaHB <sup>s</sup> Bu <sub>3</sub> in THF- <i>d</i> <sub>8</sub> .....                                                                                        | S21 |
| <i>Calculation of the Thermodynamic Hydricity and Bond Dissociation Free Energy Values</i> .....                                                                                                                                                                     | S22 |
| <b>Table S6:</b> The values used for the determination of Δ <i>G</i> <sup>o</sup> H <sup>-</sup> .....                                                                                                                                                               | S22 |
| <b>Table S7:</b> The values used for the determination of BDFE for <b>1-H<sup>-</sup></b> .....                                                                                                                                                                      | S22 |
| <b>Figure S33:</b> The <sup>1</sup> H NMR spectra (400 MHz) monitoring the reaction of <b>1-H<sup>-</sup></b> and BEt <sub>3</sub> in THF- <i>d</i> <sub>8</sub> under Ar with 1,3,5-trimethoxybenzene.....                                                          | S23 |
| <b>Figure S34:</b> The <sup>31</sup> P NMR spectra (162 MHz) monitoring the reaction of <b>1-H<sup>-</sup></b> and BEt <sub>3</sub> in THF- <i>d</i> <sub>8</sub> . Each spectrum was taken within ten minutes of addition of reagent. ....                          | S23 |
| <b>Figure S35:</b> The <sup>11</sup> B NMR spectra (128 MHz) monitoring the reaction of <b>1-H<sup>-</sup></b> and BEt <sub>3</sub> in THF- <i>d</i> <sub>8</sub> .....                                                                                              | S23 |
| <b>Figure S36:</b> IR spectrum (KBr pellet) post-reaction of <b>1-H<sup>-</sup></b> and 2 equiv. BEt <sub>3</sub> after the NMR sample was brought into an N <sub>2</sub> glovebox and volatiles were removed. ....                                                  | S24 |
| <b>Figure S37:</b> (Top) The <sup>31</sup> P{ <sup>1</sup> H} NMR spectrum (162 MHz) of the reaction of <b>1-H<sup>-</sup></b> and 1 equiv. BEt <sub>3</sub> in THF- <i>d</i> <sub>8</sub> under Ar, taken ca. ten minutes after addition of borane.....             | S25 |
| <b>Figure S38:</b> (Top) The <sup>1</sup> H NMR spectrum (400 MHz) of the reaction of <b>1-H<sup>-</sup></b> and 1 equiv. BEt <sub>3</sub> in THF- <i>d</i> <sub>8</sub> under Ar, taken ca. ten minutes after addition of borane.....                               | S25 |
| <b>Figure S39:</b> (Top) The <sup>11</sup> B NMR spectrum (128 MHz) of the reaction of <b>1-H<sup>-</sup></b> and 1 equiv. BEt <sub>3</sub> in THF- <i>d</i> <sub>8</sub> under Ar, taken ca. ten minutes after addition of borane.....                              | S26 |
| <b>Figure S40:</b> IR spectrum (KBr pellet) post-reaction of <b>1-H<sup>-</sup></b> and 1 equiv. BEt <sub>3</sub> after the NMR sample was dried brought into an N <sub>2</sub> glovebox and volatiles were removed. ....                                            | S26 |
| <b>Figure S41:</b> IR spectrum of <b>1-N<sub>2</sub></b> . (KBr pellet).....                                                                                                                                                                                         | S27 |
| <b>Figure S42:</b> Comparison of IR spectra of crystalline samples <b>1-H<sup>-</sup></b> (red) and <b>1-D<sup>-</sup></b> (blue).....                                                                                                                               | S27 |
| <b>Figure S43:</b> Top: the hydride and fingerprint region of IR spectra of <b>1-H<sup>-</sup></b> and <b>1-D<sup>-</sup></b> scaled to match intensities.....                                                                                                       | S28 |
| <b>Table S8:</b> Collected thermodynamic values for <b>1</b> , <b>2</b> , <b>3</b> , and <b>4</b> . <sup>22,23</sup> .....                                                                                                                                           | S29 |
| <b>Table S9:</b> Collected thermodynamic values for <b>1-H<sup>-</sup></b> , <b>2-H<sup>-</sup></b> , <b>3-H<sup>-</sup></b> , and <b>4-H<sup>-</sup></b> . <sup>22,23</sup> .....                                                                                   | S30 |
| <i>Computational Details</i> .....                                                                                                                                                                                                                                   | S31 |
| <b>Table S10:</b> Selected bond lengths (Å) and angles (°) for optimized structure <b>1-H<sup>-</sup></b> and its corresponding experimental crystal structure. ....                                                                                                 | S31 |
| <b>Table S11:</b> Selected bond lengths (Å) and angles (°) for optimized structure <b>1-N<sub>2</sub></b> and its corresponding experimental crystal structures.....                                                                                                 | S33 |
| <b>Figure S44:</b> Kohn-Sham Orbitals of <b>1</b> , plotted at an isovalue of 0.05.....                                                                                                                                                                              | S34 |
| <b>Figure S45:</b> Kohn-Sham Orbitals of <b>1-H<sup>-</sup></b> , plotted at an isovalue of 0.05.....                                                                                                                                                                | S35 |
| <b>Figure S46:</b> The scatterplot correlation matrix for various properties of <b>1</b> , <b>2</b> , <b>3</b> , and <b>4</b> . ....                                                                                                                                 | S36 |
| <b>Table S12:</b> The row-wise correlation matrix for various properties of <b>1</b> , <b>2</b> , <b>3</b> , and <b>4</b> ; and their respective H <sub>2</sub> and hydride adducts.....                                                                             | S36 |

**Figure S47:** The plot between literature thermodynamic hydricity values and their respective computationally determined enthalpy of hydride transfer values. .... S37

**Table S13:** A comparison of the calculated enthalpy of hydride transfer values, literature thermodynamic hydricity values, the predicted hydricity values from a linear correlation between them. .... S37

**General Considerations.** Unless otherwise stated, all manipulations were performed under a dinitrogen or argon atmosphere in a glovebox. Ultra-high purity gases were used when possible. Celite and molecular sieves were dried at 340 °C under vacuum. Standard solvents were deoxygenated by sparging with inert gas and dried by passing through activated alumina columns of a SG Water solvent purification system. Deuterated solvents were purchased from Cambridge Isotope Laboratories, Inc., degassed via freeze-pump-thaw cycles and stored over activated 4 Å molecular sieves. Reagents were purchased from Sigma Aldrich or Strem Chemicals. Trimethyl borate was purified by stirring with excess sodium metal under an inert atmosphere followed by vacuum distillation. Potassium *tert*-butoxide was sublimed under high-vacuum prior to use. Both N(*o*-(NHCH<sub>2</sub>P<sup>Pr</sup><sub>2</sub>)C<sub>6</sub>H<sub>4</sub>)<sub>3</sub> (abbreviated as LH<sub>3</sub>) and Li<sub>3</sub>NiL was prepared according to literature methods.<sup>1,2</sup> All other reagents were used without further purification. Elemental analyses were performed by Robertson Microlit Laboratories, Inc. (Ledgewood, NJ).

**Physical Methods.** <sup>1</sup>H and <sup>31</sup>P NMR spectra were recorded on a Bruker 400 MHz spectrometer. NMR shifts were referenced to the internal solvent residual signal (for <sup>1</sup>H spectra) or an external H<sub>3</sub>PO<sub>4</sub> reference (for <sup>31</sup>P spectra). IR spectra were obtained in KBr pellets using a Bruker Tensor-37 FTIR spectrometer with OPUS 6.5 software. Cyclic voltammetry was conducted using a CH Instruments 600 electrochemical analyzer. The one-cell setup utilized a glassy carbon working electrode, Pt wire counter electrode, and Ag wire pseudo-reference electrode. Analyte solutions were prepared in 0.4 M [<sup>n</sup>Bu<sub>4</sub>N]PF<sub>6</sub> in THF and referenced internally to the FeCp<sub>2</sub><sup>+</sup>/FeCp<sub>2</sub> (abbreviated as Fc<sup>+</sup>/Fc) redox couple. UV–vis spectra were collected on a Cary-300 instrument.

### **X-ray Crystallography and Structure Refinement Details**

A yellow rod of **1-N<sub>2</sub>** (0.15 × 0.15 × 0.11 mm), a red rod of **1** (0.18 × 0.18 × 0.16 mm), a yellow needle of [(K[2.2.2]Crypt)<sup>+</sup>][**1-H**<sup>-</sup>] (0.2 × 0.1 × 0.1 mm) were mounted on a 100 μm MiTeGen microloop and placed on a Bruker PHOTON-II CMOS diffractometer for data collection at 100(2) K. The data collection was carried out using Mo K $\alpha$  radiation with normal parabolic mirrors. The intensities were corrected for absorption and decay with SADABS.<sup>3</sup> Final cell constants were obtained from least-squares fits from all reflections. Crystal structure solution was done through intrinsic phasing (SHELXT-2014/5),<sup>4</sup> which provided most non-hydrogen atoms. Full matrix least-squares/difference Fourier cycles were performed using SHELXL-2016/6 and GUI ShelXle to locate the remaining non-hydrogen atoms.<sup>5,6</sup> All non-hydrogen atoms were refined with anisotropic displacement parameters. All non-hydride hydrogen atoms were placed in ideal positions and refined as riding atoms with relative isotropic displacement parameters. The hydride hydrogen atom of [(K[2.2.2]Crypt)<sup>+</sup>]**1-H**<sup>-</sup>] was placed via residual electron density. The crystal structures of **1** contained heavily disordered solvent molecules. The SQUEEZE function of the PLATON program was used to remove these solvent molecules from the void space.<sup>7</sup> The SQUEEZE function removed 172 electrons from a void-space volume of 919 Å<sup>3</sup> in **1**. These values are consistent with the presence of approximately 3 hexane molecules in the unit cell of **1**.

## Experimental Procedures

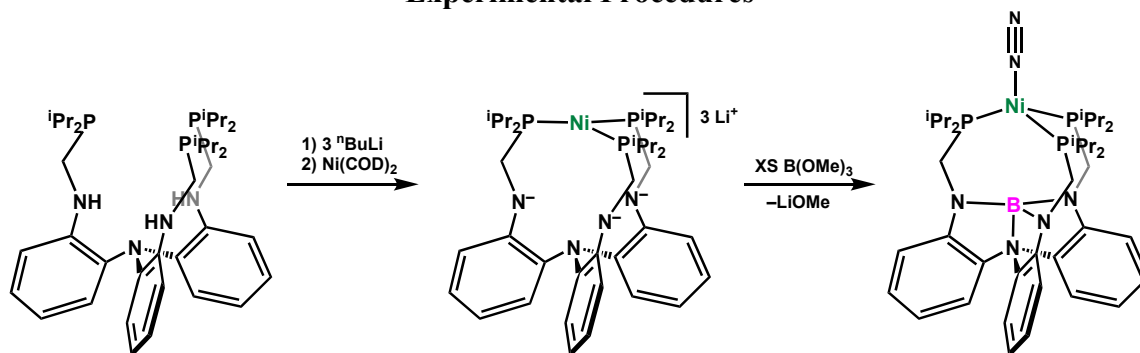

**Synthesis of  $(N_2)NiB(N(o-(NCH_2P^iPr_2)C_6H_4)_3)$ , **1-N<sub>2</sub>**.** The entirety of this procedure was performed under an  $N_2$  atmosphere. In a Teflon-valved bomb flask,  $Li_3NiL$  (104 mg, 137  $\mu$ mol) was dissolved in ca. 15 mL 1:1 THF/toluene. To this solution was added  $B(OMe)_3$  (306  $\mu$ L, 2.75 mmol). The flask was then sealed and heated for 24 h at 50  $^\circ$ C. The solution was allowed to cool, and volatiles were removed *in vacuo*. The deep-red residue was extracted with pentane (3 x 5 mL) and filtered over Celite. The solvent was removed *in vacuo* and the residue was washed with a minimal amount of cold ( $-78$   $^\circ$ C) pentane. The residue was redissolved in ca. 10 mL pentane and was bulk recrystallized via the slow evaporation of pentane into toluene. Yield: 74.5 mg, 73%. Single crystals suitable for X-ray diffraction were grown at  $-25$   $^\circ$ C from a concentrated pentane solution under dinitrogen.  $^1H\{^{31}P\}$  NMR (400 MHz, THF-*d*<sub>8</sub>),  $\delta$ : 7.52 (d,  $J = 7.8$  Hz, 3H, aryl), 7.06 (t,  $J = 7.7$  Hz, 3H, aryl), 6.76 (d,  $J = 8.1$  Hz, 3H, aryl), 6.59 (t,  $J = 7.6$  Hz, 3H, aryl), 3.52 (br, 6H, CH<sub>2</sub>), 2.18 (m, 6H, CHMe<sub>2</sub>), 1.43 (d,  $J = 7.2$  Hz, 18H, CH<sub>3</sub>), 1.30 (br, 18H, CH<sub>3</sub>).  $^{31}P\{^1H\}$  NMR (162 MHz, THF-*d*<sub>8</sub>),  $\delta$ : 23.9.  $^{11}B$  NMR (128 MHz, THF-*d*<sub>8</sub>),  $\delta$ : 17 (br). IR (KBr pellet),  $cm^{-1}$ : 2065 ( $\nu_{N_2}$ ).  $C_{39}H_{60}N_6BP_3Ni$ : 60.38 C, 7.80 H, 10.84 N. Found: 60.68 C, 7.72 H, 10.68 N.

**Synthesis of  $NiB(N(o-(NCH_2P^iPr_2)C_6H_4)_3)$ , **1**.** The evaporation of benzene (ca. 6 ml) from a solution of **1-N<sub>2</sub>** (15.6 mg, 20.1  $\mu$ mol) under an argon atmosphere results in the quantitative production of red **1** (14.9 mg). Single crystals suitable for X-ray diffraction were grown at  $-35$   $^\circ$ C from a concentrated pentane solution under argon.  $^1H\{^{31}P\}$  NMR (400 MHz,  $C_6D_6$ ),  $\delta$ : 7.23 (dd,  $J = 7.72$  & 1.34 Hz, 3H, Aryl), 7.05 (td,  $J = 7.84$  & 1.36 Hz, 3H, Aryl), 6.72 (d,  $J = 8.10$  Hz, 3H, Aryl), 6.50 (td,  $J = 7.63$  & 0.9 Hz, 3H, Aryl), 3.57 (br, 6H, CH<sub>2</sub>), 2.11 (m, 6H, CHMe<sub>2</sub>), 1.44 (m, 18H, CH<sub>3</sub>), 1.17 (br, 18H, CH<sub>3</sub>).  $^{31}P\{^1H\}$  NMR (162 MHz,  $C_6D_6$ ),  $\delta$ : 17.1.  $^{11}B$  NMR (128 MHz,  $C_6D_6$ ),  $\delta$ : 17 (br). UV-Vis [THF,  $\lambda_{max}$  (nm),  $\epsilon$  ( $M^{-1}cm^{-1}$ )]: 520 (4800). Anal. Calcd.  $C_{39}H_{60}N_4BP_3Ni$ : 62.68 C, 8.09 H, 7.5 N.  $C_{39}H_{60}N_4BP_3O_3Ni \cdot (C_6H_6)_{0.5}$ : 60.46 C, 7.61 H, 6.71 N. Found: 60.56 C, 7.68 H, 6.93 N. Note: Lypholization from benzene was performed to produce the nitrogen free sample used for elemental analysis. A molecule of benzene per two of metal complexes retained by the sample coupled by inadvertent oxidation of the phosphines allows the sample to pass by 0.22%.

**In situ synthesis of  $(H_2)NiB(N(o-(NCH_2P^iPr_2)C_6H_4)_3)$ , **1-H<sub>2</sub>**.** A solution of **1-N<sub>2</sub>** (5.6 mg, 7.2  $\mu$ mol) in 550  $\mu$ L  $C_6D_6$  in a J-Young NMR tube was subjected to three freeze-pump-thaw cycles. To the headspace 1 atm  $H_2$  was admitted and the tube was sealed. As the solution was allowed to thaw the color changed from a deep-red color to a clear yellow solution.  $^1H\{^{31}P\}$  NMR (400 MHz,  $C_6D_6$ )  $\delta$ : 7.25 (dd,  $J = 7.7$  & 1.4 Hz, 3H, Aryl), 7.06 (td,  $J = 7.8$  & 1.4 Hz, 3H, Aryl), 6.82 (dd,  $J$

= 8.1 & 1.2 Hz, 3H, Aryl), 6.53 (td,  $J = 7.6$  & 1.2 Hz, 3H, Aryl), 3.59 (s, 6H, CH<sub>2</sub>), 1.96 (app q,  $J = 7.7$  Hz, 6H, CH), 1.35 (app q,  $J = 7.2$  Hz, 18H, CH<sub>3</sub>), 1.14 (br 18H, CH<sub>3</sub>), 0.48 (s, 2H, H<sub>2</sub>). <sup>31</sup>P{<sup>1</sup>H} NMR (162 MHz, C<sub>6</sub>D<sub>6</sub>)  $\delta$ : 31.7. <sup>11</sup>B NMR (128 MHz, C<sub>6</sub>D<sub>6</sub>)  $\delta$ : 18 (br). Due to the labile nature of the H<sub>2</sub> ligand, elemental analysis was not performed.

**Synthesis of [K([2.2.2]-crypt)][HNiB(N(*o*-(NCH<sub>2</sub>P<sup>i</sup>Pr<sub>2</sub>)C<sub>6</sub>H<sub>4</sub>)<sub>3</sub>)]**, [(K[2.2.2]Crypt)<sup>+</sup>]**1-H<sup>-</sup>**. In the glovebox, **1** (31.7 mg, 42.4  $\mu$ mol), [2.2.2]-cryptand (79.8 mg, 212  $\mu$ mol), and potassium *tert*-butoxide (95.2 mg, 848  $\mu$ mol) were dissolved in ca. 10 mL of toluene in a 50 mL Teflon-valved bomb flask. Vacuum was briefly applied to evacuate the headspace of the flask. The flask was removed from the glovebox and attached to the vacuum line where 4 atm of H<sub>2</sub> (the resulting pressure from cooling 1 atm H<sub>2</sub> with LN<sub>2</sub>) was administered to the flask, which resulted in a color change from deep-red to red-orange. After the flask was left sealed at this pressure for 3 days, the solution was frozen with liquid nitrogen. Separately, a Teflon-valved bomb flask of hexanes was degassed via three freeze-pump-thaw cycles and was saturated with H<sub>2</sub>. Approximately 40 mL of hexanes was cannula transferred via an overpressure of H<sub>2</sub> creating a layer over the toluene solution. The entire solution was frozen, 4 atm of H<sub>2</sub> was administered, and the vessel was sealed. After a week small yellow-orange XRD quality needles were apparent. The mother-liquor was removed and the flask was dried under vacuum. The crystals were washed with hexanes, and extracted and filtered with ca. 10 mL DME to give an orange residue. Yield: 30.6 mg, 62%. The deuteride isotopologue was synthesized in an analogous manner, only using D<sub>2</sub> in the place of H<sub>2</sub>. <sup>1</sup>H{<sup>31</sup>P} NMR (400 MHz, THF)  $\delta$  6.79 (d,  $J = 5.9$  Hz, 3H, Aryl), 6.50 (m, 6H, Aryl), 6.14 (td,  $J = 7.0$  & 2.1 Hz, 3H, Aryl), 3.56 (s, 12H, Cryptand (OCH<sub>2</sub>)<sub>2</sub>), 3.52 (t,  $J = 4.6$  Hz, 12H, Cryptand OCH<sub>2</sub>CH<sub>2</sub>N), 3.44 (d,  $J = 9.5$  Hz, 3H, CHH'), 2.92 (d,  $J = 10.6$  Hz, 3H, CHH'), 2.53 (t,  $J = 4.7$  Hz, 12H, Cryptand OCH<sub>2</sub>CH<sub>2</sub>N), 1.96 (app p,  $J = 7.3$  Hz, 3H, CHMe<sub>2</sub>), 1.64 (sept,  $J = 7.4$  Hz, 3H, CHMe<sub>2</sub>), 1.43 (d, 9H,  $J = 7.41$  Hz, <sup>i</sup>Pr CH<sub>3</sub>), 1.26 (d,  $J = 7.23$  Hz, 9H, <sup>i</sup>Pr CH<sub>3</sub>), 1.12 (d,  $J = 7.7$  Hz, 9H, <sup>i</sup>Pr CH<sub>3</sub>), 0.79 (d,  $J = 6.93$  Hz, 9H, <sup>i</sup>Pr CH<sub>3</sub>), -8.26 (1:1:1:1 q, <sup>2</sup>J<sub>B-H</sub> = 25.5 Hz, 1H, NiH). <sup>31</sup>P{<sup>1</sup>H} NMR (162 MHz, THF)  $\delta$  58.73 (s). <sup>11</sup>B NMR (128 MHz, THF)  $\delta$  22.67 (d, <sup>2</sup>J<sub>B-H</sub> = 25.9 Hz). Multiple combustion analysis attempts were made. The reactive nature of the complex likely hindered measurement due to inadvertent decomposition.

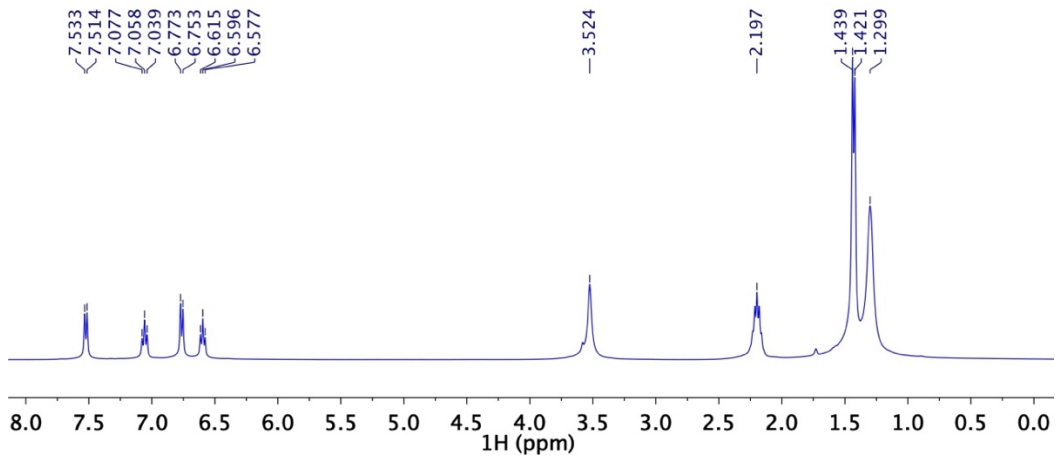

**Figure S1:**  $^1\text{H}\{^{31}\text{P}\}$  NMR spectrum (400 MHz,  $\text{C}_6\text{D}_6$ ) of **1-N<sub>2</sub>**.

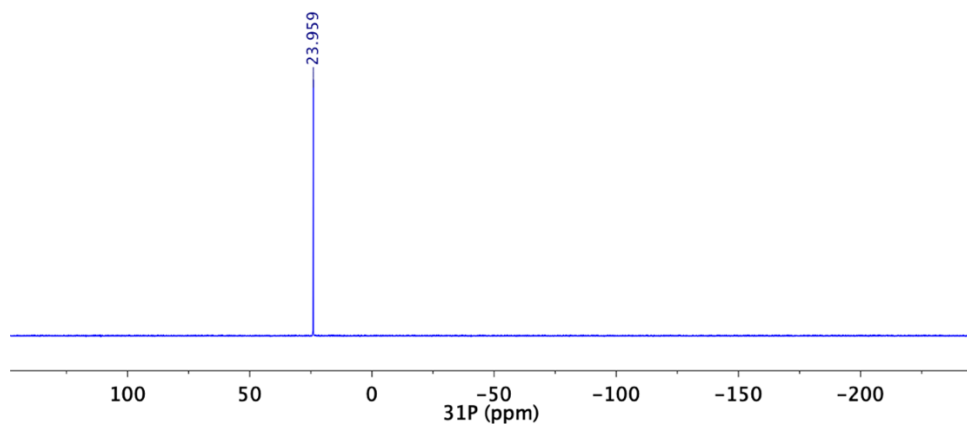

**Figure S2:**  $^{31}\text{P}\{^1\text{H}\}$  NMR spectrum (162 MHz,  $\text{C}_6\text{D}_6$ ) of **1-N<sub>2</sub>**.

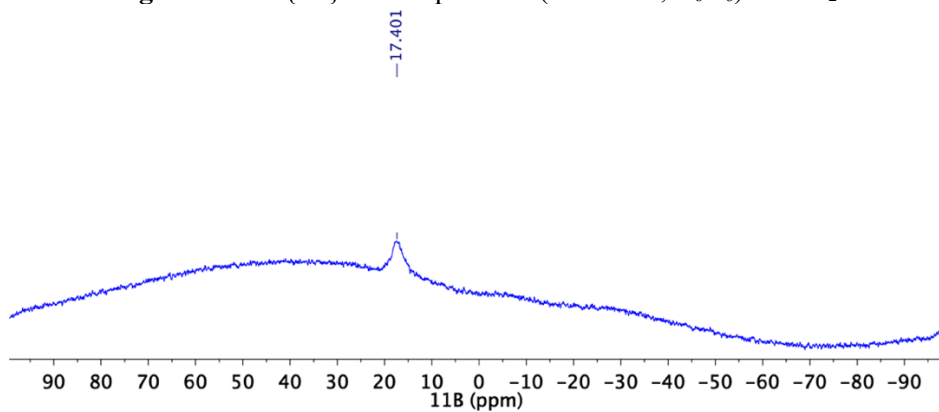

**Figure S3:**  $^{11}\text{B}$  NMR spectrum (128 MHz,  $\text{C}_6\text{D}_6$ ) of **1-N<sub>2</sub>**.



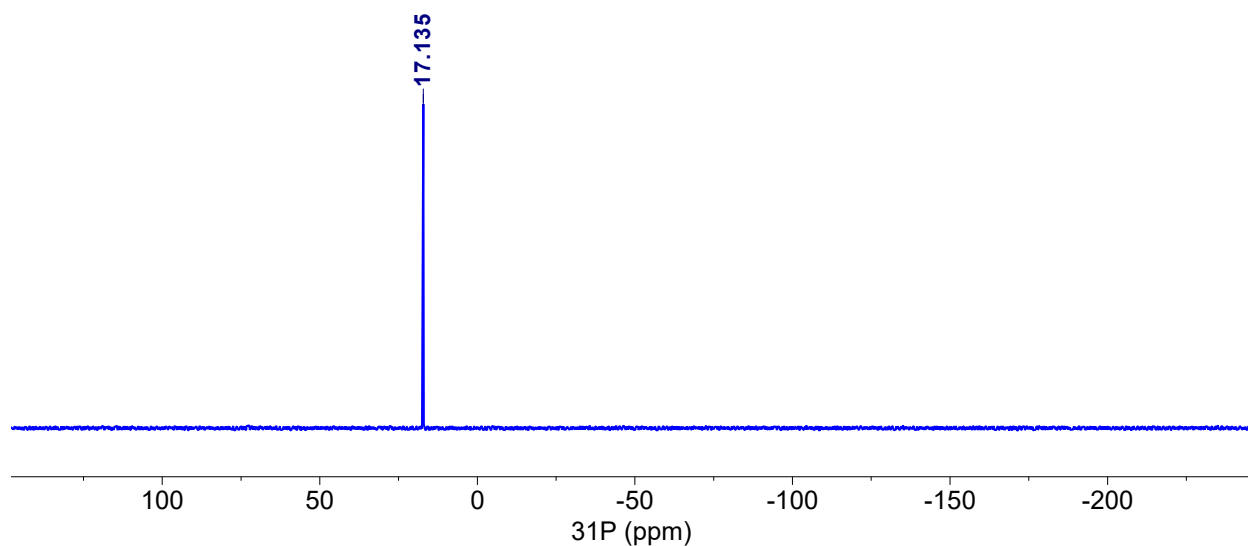

Figure S4:  $^{31}\text{P}\{^1\text{H}\}$  NMR spectrum (162 MHz,  $\text{C}_6\text{D}_6$ ) of **1** under 1 atm of argon.

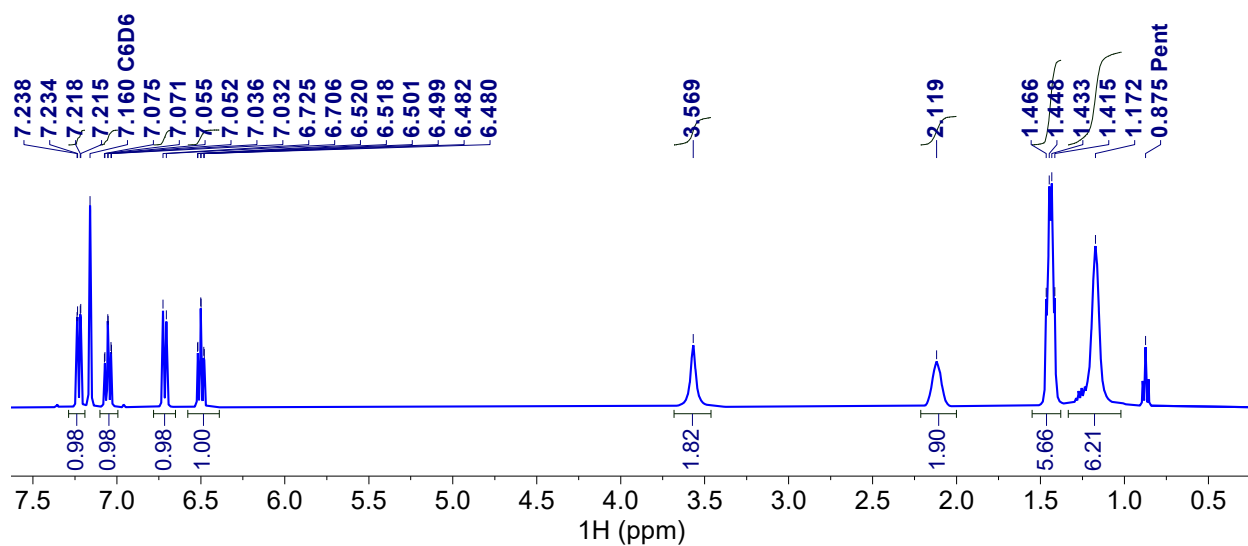

Figure S5:  $^1\text{H}$  NMR spectrum (400 MHz,  $\text{C}_6\text{D}_6$ ) of **1** under 1 atm of argon.

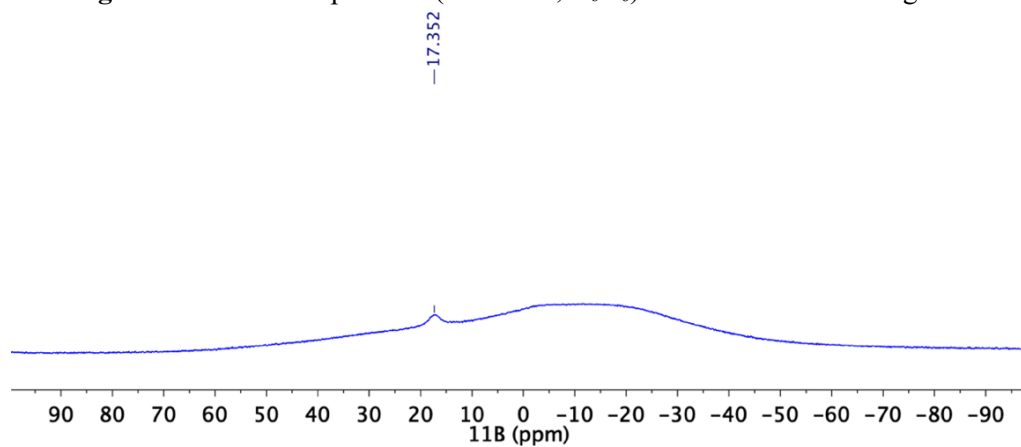

Figure S6:  $^{11}\text{B}$  NMR spectrum (128 MHz,  $\text{C}_6\text{D}_6$ ) of **1** under 1 atm of argon.

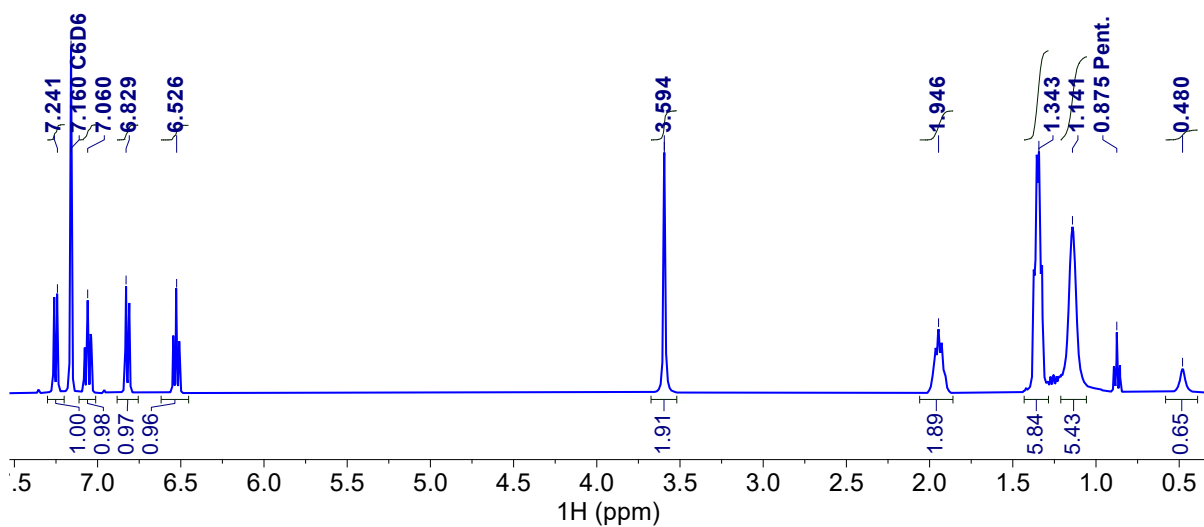

Figure S7:  $^1\text{H}$  NMR spectrum (400 MHz,  $\text{C}_6\text{D}_6$ ) of  $1\text{-H}_2$  under 1 atm of  $\text{H}_2$ .

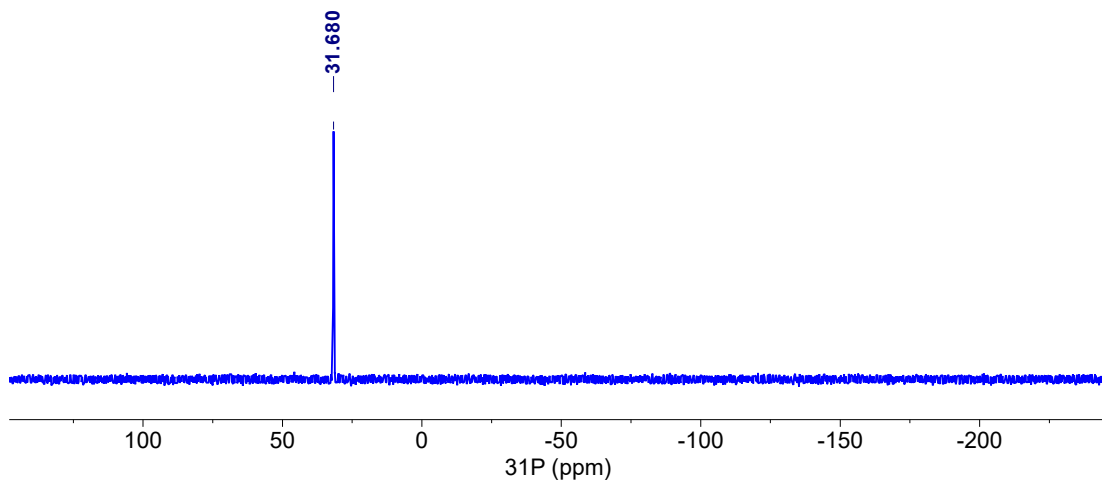

Figure S8:  $^{31}\text{P}\{^1\text{H}\}$  NMR spectrum (162 MHz,  $\text{C}_6\text{D}_6$ ) of  $1\text{-H}_2$  under 1 atm of  $\text{H}_2$ .

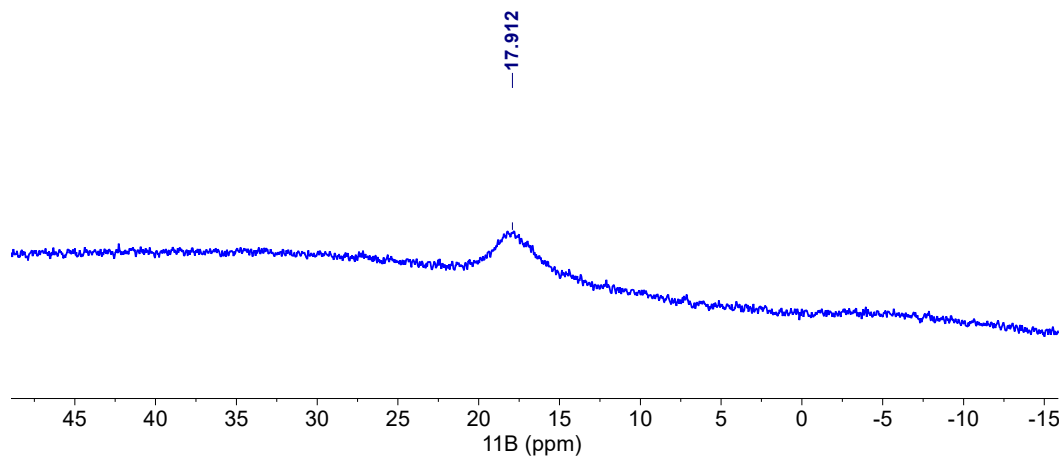

Figure S9:  $^{11}\text{B}$  NMR spectrum (128 MHz,  $\text{C}_6\text{D}_6$ ) of  $1\text{-H}_2$  under 1 atm of  $\text{H}_2$ .

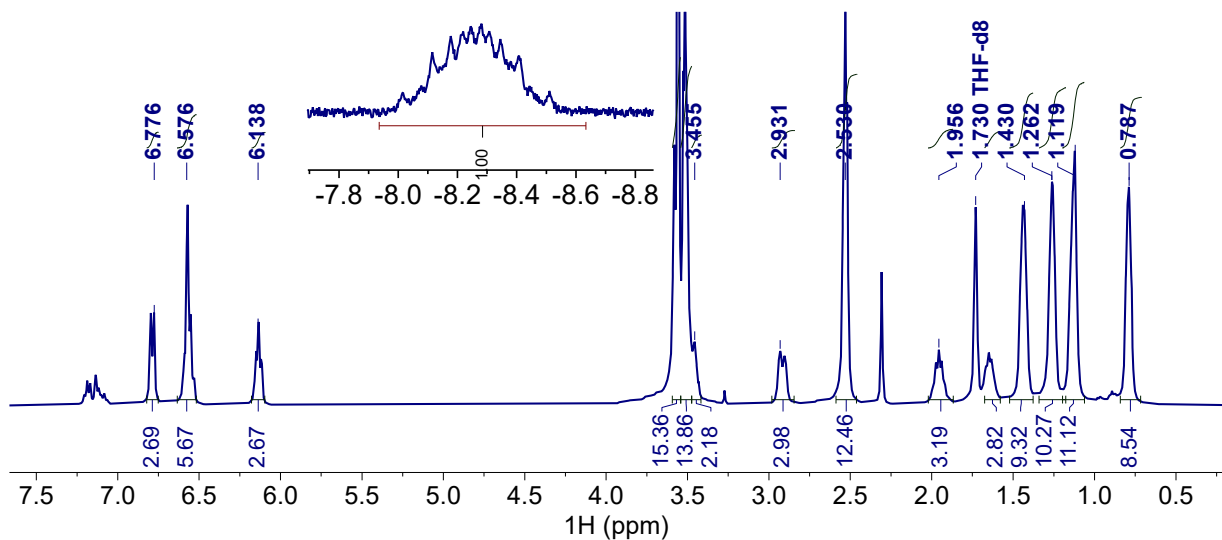

**Figure S10:**  $^1\text{H}$  NMR spectrum (400 MHz,  $\text{THF-d}_8$ ) of  $[(\text{K}[2.2.2]\text{Crypt})^+]\mathbf{1-H}^-$ . Note the signals at 7.2 and 2.3 ppm correspond to a co-crystallized toluene.

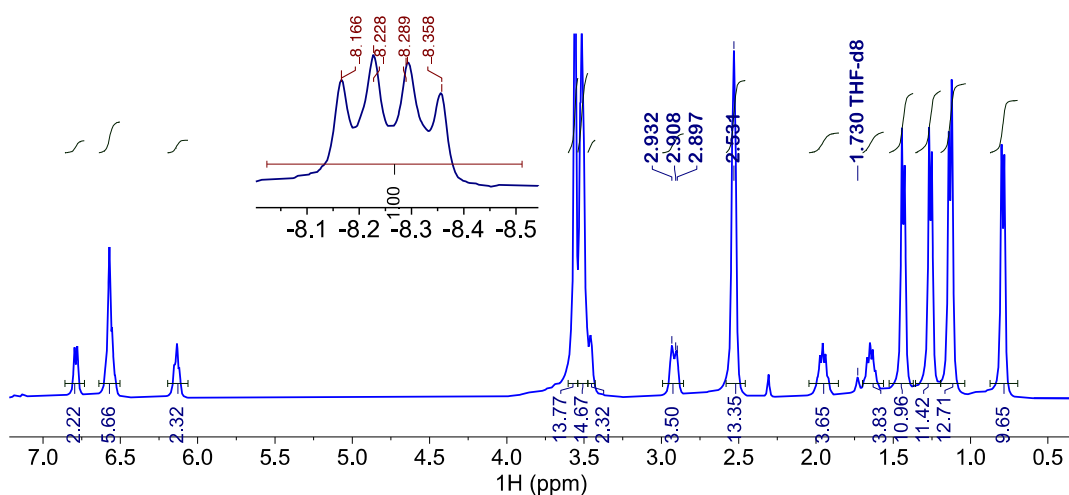

**Figure S11:**  $^1\text{H}\{^{31}\text{P}\}$  NMR spectrum (400 MHz,  $\text{THF-d}_8$ ) of  $[(\text{K}[2.2.2]\text{Crypt})^+]\mathbf{1-H}^-$ .

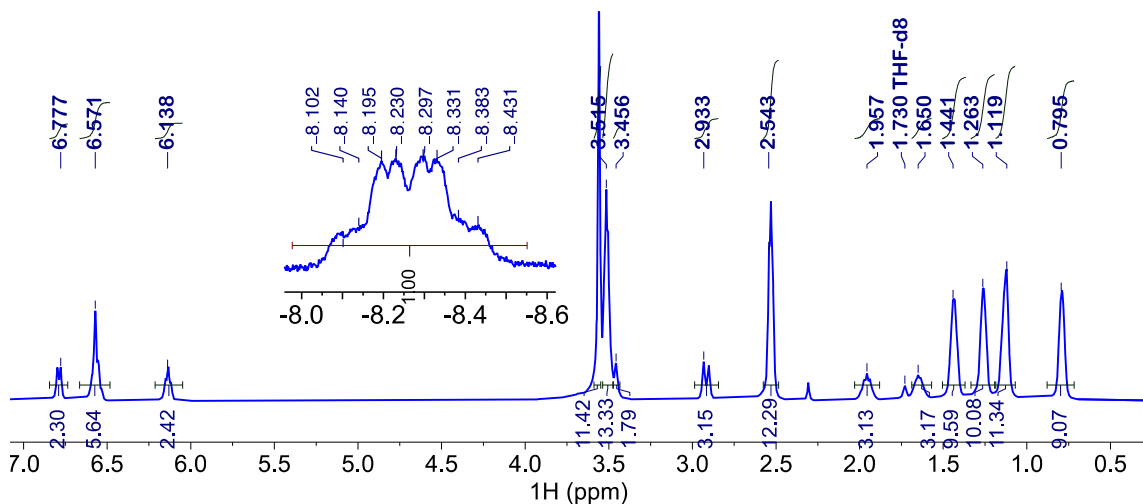

**Figure S12:**  $^1\text{H}\{^{11}\text{B}\}$  NMR spectrum (400 MHz,  $\text{THF-d}_8$ ) of  $[(\text{K}[2.2.2]\text{Crypt})^+]\mathbf{1-H}^-$ .

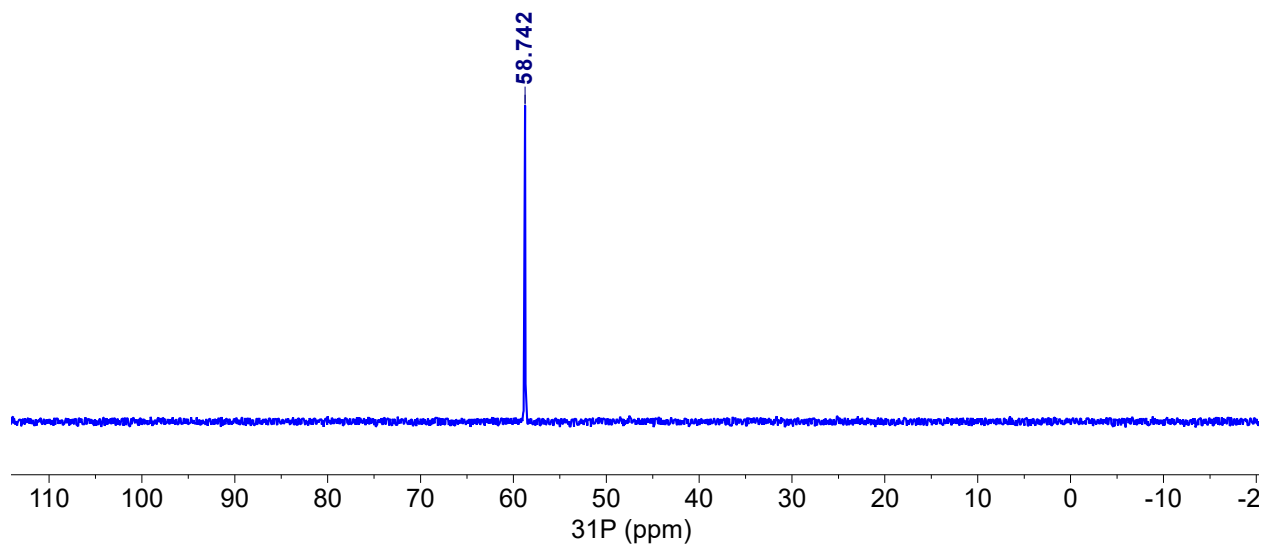

Figure S13:  $^{31}\text{P}\{^1\text{H}\}$  NMR spectrum (168 MHz,  $\text{THF-}d_8$ ) of  $[(\text{K}[2.2.2]\text{Crypt})^+]\mathbf{1-H}^-$ .

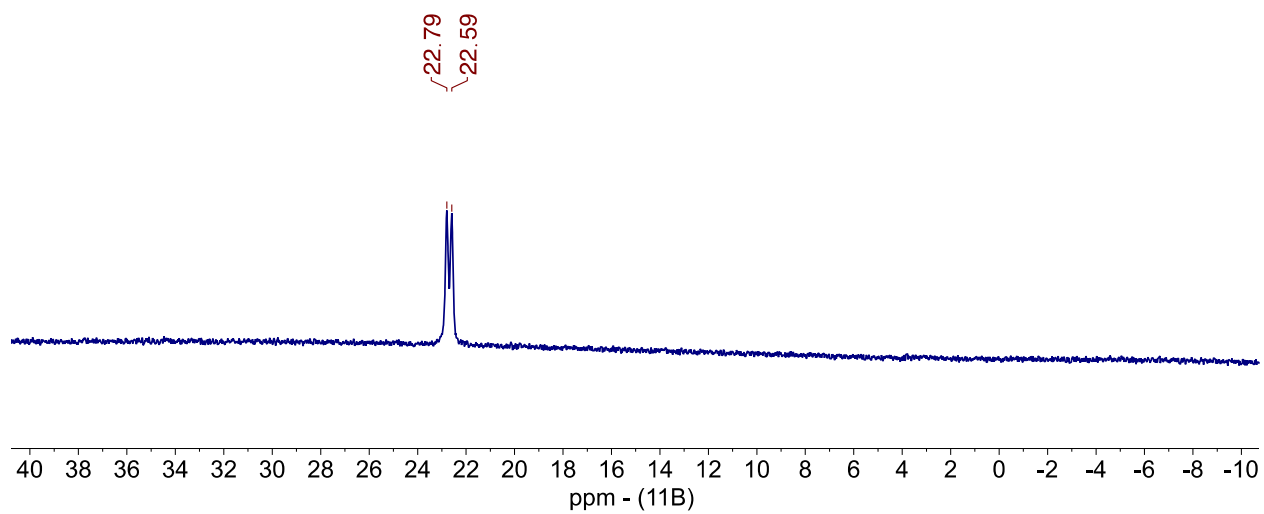

Figure S14:  $^{11}\text{B}$  NMR spectrum (128 MHz,  $\text{THF-}d_8$ ) of  $[(\text{K}[2.2.2]\text{Crypt})^+]\mathbf{1-H}^-$ .

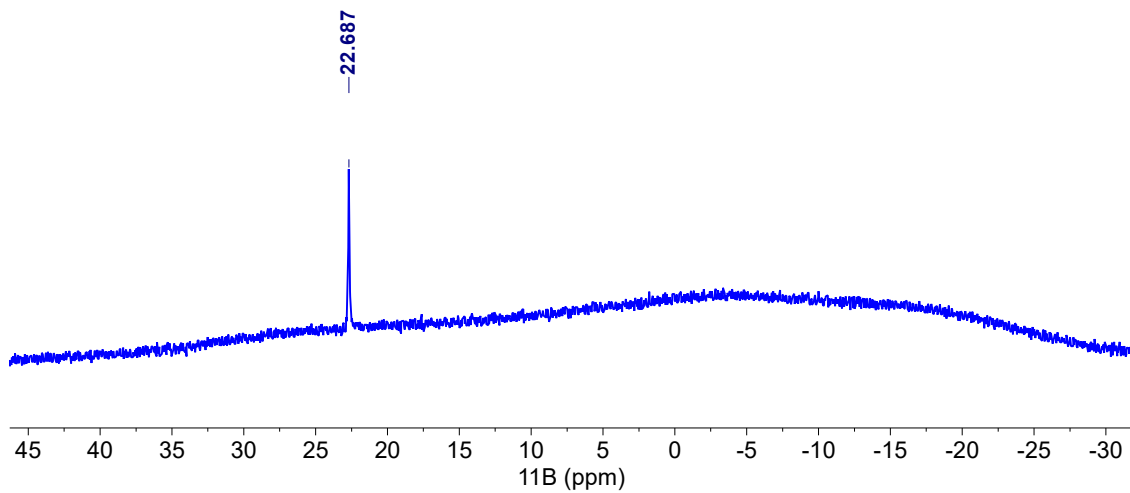

Figure S15:  $^{11}\text{B}\{^1\text{H}\}$  NMR spectrum (128 MHz,  $\text{THF-}d_8$ ) of  $[(\text{K}[2.2.2]\text{Crypt})^+]\mathbf{1-H}^-$ .

**Table S1:** Crystallographic metrics for **1**, **1-N<sub>2</sub>**, and **1-H<sup>-</sup>**.

| Metric                                              | NiBL<br>1                                                        | N <sub>2</sub> NiBL<br>1-N <sub>2</sub>                          | [K(2.2.2-Crypt)] HNiBL<br>1-H <sup>-</sup>                                                                     |
|-----------------------------------------------------|------------------------------------------------------------------|------------------------------------------------------------------|----------------------------------------------------------------------------------------------------------------|
| CCDC Deposit Number                                 | 2132870                                                          | 2132872                                                          | 2132871                                                                                                        |
| Chemical Formula                                    | C <sub>39</sub> H <sub>60</sub> BN <sub>4</sub> NiP <sub>3</sub> | C <sub>39</sub> H <sub>60</sub> BN <sub>6</sub> NiP <sub>3</sub> | C <sub>57</sub> H <sub>97</sub> BKN <sub>6</sub> NiO <sub>6</sub> P <sub>3</sub> C <sub>7</sub> H <sub>8</sub> |
| FW                                                  | 747.34                                                           | 775.36                                                           | 1163.79                                                                                                        |
| Temperature (K)                                     | 100(2)                                                           | 100(2)                                                           | 125(2)                                                                                                         |
| Crystal System                                      | Trigonal                                                         | Monoclinic                                                       | Monoclinic                                                                                                     |
| Space Group                                         | P $\bar{3}$ c1                                                   | P2 <sub>1</sub> /n                                               | P2 <sub>1</sub> /n                                                                                             |
| a (Å)                                               | 14.9296(11)                                                      | 16.6281(5)                                                       | 16.9341(14)                                                                                                    |
| b (Å)                                               | 14.9296(11)                                                      | 13.0544(5)                                                       | 22.9728(19)                                                                                                    |
| c (Å)                                               | 23.2119(18)                                                      | 18.4221(7)                                                       | 18.7504(13)                                                                                                    |
| $\alpha$ (°)                                        | 90                                                               | 90                                                               | 90                                                                                                             |
| $\beta$ (°)                                         | 90                                                               | 93.0200(10)                                                      | 112.891(2)                                                                                                     |
| $\gamma$ (°)                                        | 120                                                              | 90                                                               | 90                                                                                                             |
| Volume (Å <sup>3</sup> )                            | 4480.6(7)                                                        | 3993.3(2)                                                        | 6719.9(9)                                                                                                      |
| Z                                                   | 4                                                                | 4                                                                | 4                                                                                                              |
| Density (g/cm <sup>3</sup> )                        | 1.108                                                            | 1.290                                                            | 1.150                                                                                                          |
| $\mu$ (mm <sup>-1</sup> )                           | 0.569                                                            | 0.642                                                            | 0.469                                                                                                          |
| $\lambda$ (Å)                                       | 0.71073                                                          | 0.71073                                                          | 0.71073                                                                                                        |
| $\theta$ (°)                                        | 2.358 to 26.723                                                  | 2.214 to 28.332                                                  | 2.129 to 28.344                                                                                                |
| Total Reflections                                   | 49173                                                            | 35413                                                            | 107823                                                                                                         |
| Unique Reflections                                  | 3168                                                             | 9903                                                             | 16747                                                                                                          |
| Data/Restraints/Parameters                          | 3168 / 0 / 149                                                   | 9903 / 0 / 463                                                   | 16747 / 0 / 705                                                                                                |
| R <sub>1</sub> , wR <sub>2</sub> (I>2 $\sigma$ (I)) | 0.0344, 0.0754                                                   | 0.0455, 0.0792                                                   | 0.0458, 1065                                                                                                   |

**Table S2:** Selected torsion metrics and geometric indices<sup>26-28</sup> for **1**, **1-N<sub>2</sub>**, and **1-H<sup>-</sup>**.

| Angle (°)             | 1     | 1-N <sub>2</sub> | 1-H <sup>-</sup> |
|-----------------------|-------|------------------|------------------|
| Ni-P-N/P-N-B Planes 1 | 4.88  | 11.67            | 27.53            |
| Ni-P-N/P-N-B Planes 2 | –     | 8.97             | 27.66            |
| Ni-P-N/P-N-B Planes 3 | –     | 10.12            | 27.51            |
| Avg.                  | 4.88  | 10.25            | 27.57            |
| B-N-C-P Torsion 1     | 78.03 | 82.31            | 2.54             |
| B-N-C-P Torsion 2     | –     | 80.77            | 17.73            |
| B-N-C-P Torsion 3     | –     | 74.21            | 11.24            |
| Avg.                  | 78.03 | 79.10            | 10.50            |
| P-Ni-B-N Torsion 1    | 3.90  | 8.63             | 34.52            |
| P-Ni-B-N Torsion 2    | –     | 6.78             | 34.61            |
| P-Ni-B-N Torsion 3    | –     | 7.53             | 34.35            |
| Avg.                  | 3.90  | 7.65             | 34.49            |
| $\tau_4/\tau_4'$      | –     | 0.97/0.97        | –                |
| $\tau_5$              | –     | –                | 0.99             |

**Table S3:** Crystallographic bond metrics (Å) and angles (°) for **1**, **1-N<sub>2</sub>**, and **1-H<sup>-</sup>**.

| Metric                                        | 1           | 1-N <sub>2</sub> | 1-H <sup>-</sup> |
|-----------------------------------------------|-------------|------------------|------------------|
| Ni-B                                          | 3.380(4)    | 3.735(3)         | 2.235(2)         |
| Avg. Ni-P                                     | 2.1381(5)   | 2.2065(5)        | 2.1451(5)        |
| Ni-P1                                         | –           | 2.199(1)         | 2.1328(6)        |
| Ni-P2                                         | –           | 2.204(3)         | 2.1501(6)        |
| Ni-P3                                         | –           | 2.199(1)         | 2.1523(6)        |
| Avg P-Ni-P                                    | 117.251(9)  | 109.67(4)        | 117.97(3)        |
| P1-Ni-P2                                      | –           | 109.57 (3)       | 118.64(2)        |
| P2-Ni-P3                                      | –           | 111.51(3)        | 117.64(2)        |
| P1-Ni-P3                                      | –           | 107.93(3)        | 117.72(2)        |
| Ni-P <sub>3</sub> Plane                       | 0.3583(6)   | 0.7280(5)        | 0.3057(4)        |
| Avg. B-N <sub>Amide</sub>                     | 1.5322(16)  | 1.527(6)         | 1.576(3)         |
| B-N1                                          | –           | 1.527(3)         | 1.5713(27)       |
| B-N2                                          | –           | 1.529(3)         | 1.5757(27)       |
| B-N3                                          | –           | 1.525(3)         | 1.5833(27)       |
| Avg. N <sub>Amide</sub> -B-N <sub>Amide</sub> | 117.26(7)   | 117.06(3)        | 111.56(2)        |
| N1-B-N2                                       | –           | 118.48(2)        | 111.56(15)       |
| N2-B-N3                                       | –           | 115.9(2)         | 112.65(15)       |
| N1-B-N3                                       | –           | 116.81(2)        | 111.87(16)       |
| B-N <sub>Apical</sub>                         | 1.702(4)    | 1.682(3)         | 2.803(5)         |
| B-N <sub>3</sub> Plane                        | -0.2590(35) | -0.2646(29)      | 0.4552(22)       |
| N <sub>2</sub> -Ni-P1                         | –           | 107.44(7)        | –                |
| N <sub>2</sub> -Ni-P2                         | –           | 108.67(7)        | –                |
| N <sub>2</sub> -Ni-P3                         | –           | 111.57(7)        | –                |
| Ni-N <sub>2</sub>                             | –           | 1.820(9)         | –                |
| N-N                                           | –           | 1.116(5)         | –                |
| B-Ni-H                                        | –           | –                | 188.64(2)        |
| Ni-H                                          | –           | –                | 1.56(2)          |

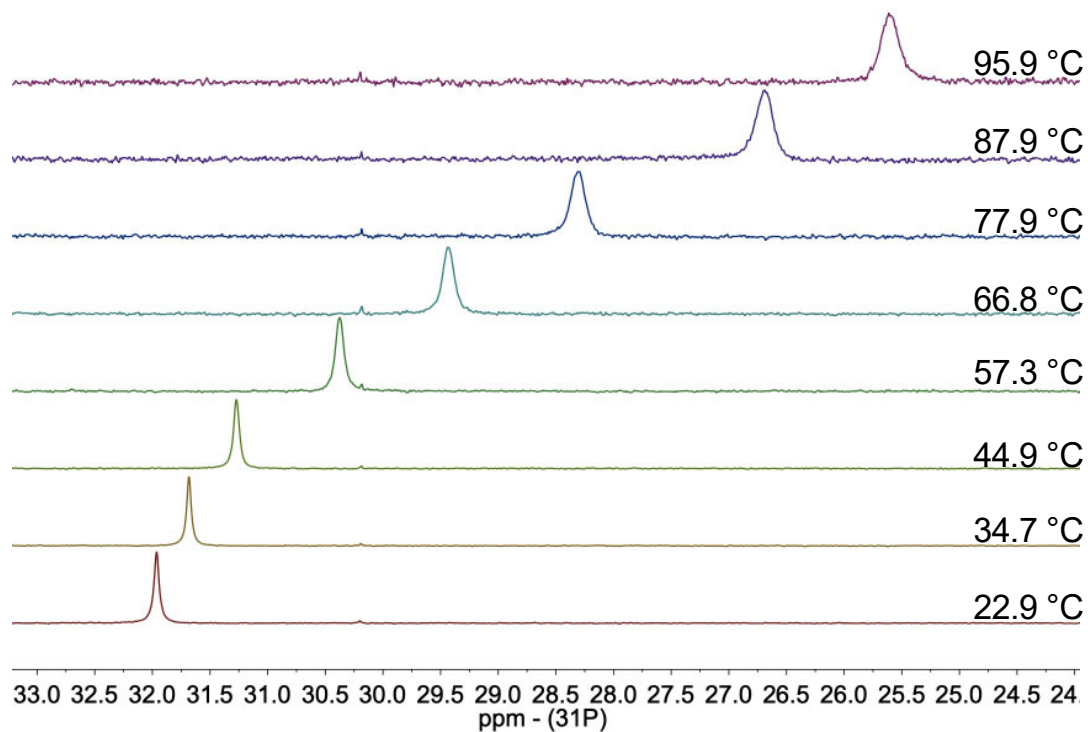

**Figure S16:** Variable temperature  $^{31}\text{P}\{^1\text{H}\}$  NMR spectra (128 MHz, toluene- $d_8$ ) of a 14.6 mM solution of **1-H<sub>2</sub>** under 1 atm H<sub>2</sub>.

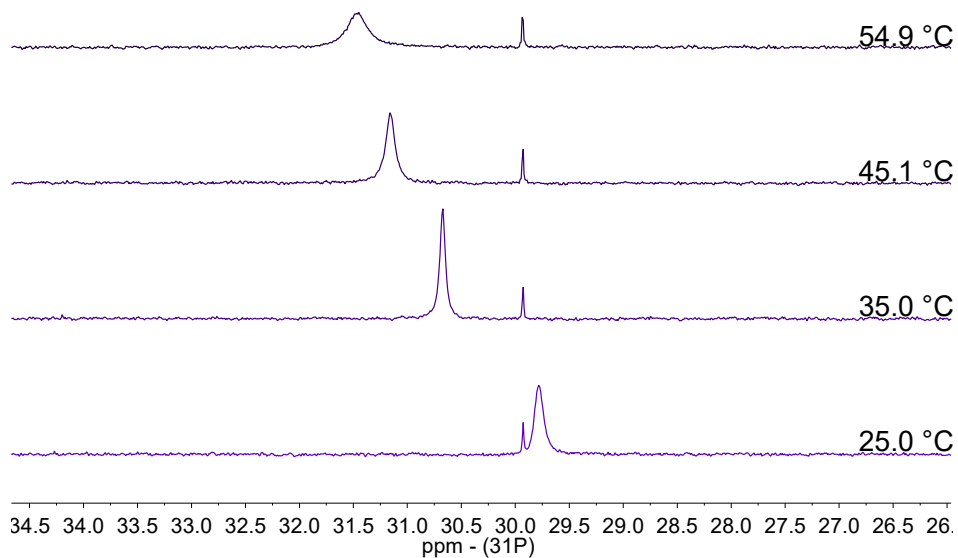

**Figure S17:** Variable temperature  $^{31}\text{P}\{^1\text{H}\}$  NMR spectra (128 MHz, THF- $d_8$ ) of 15.4 mM solution of **1-H<sub>2</sub>** under 1 atm H<sub>2</sub>.

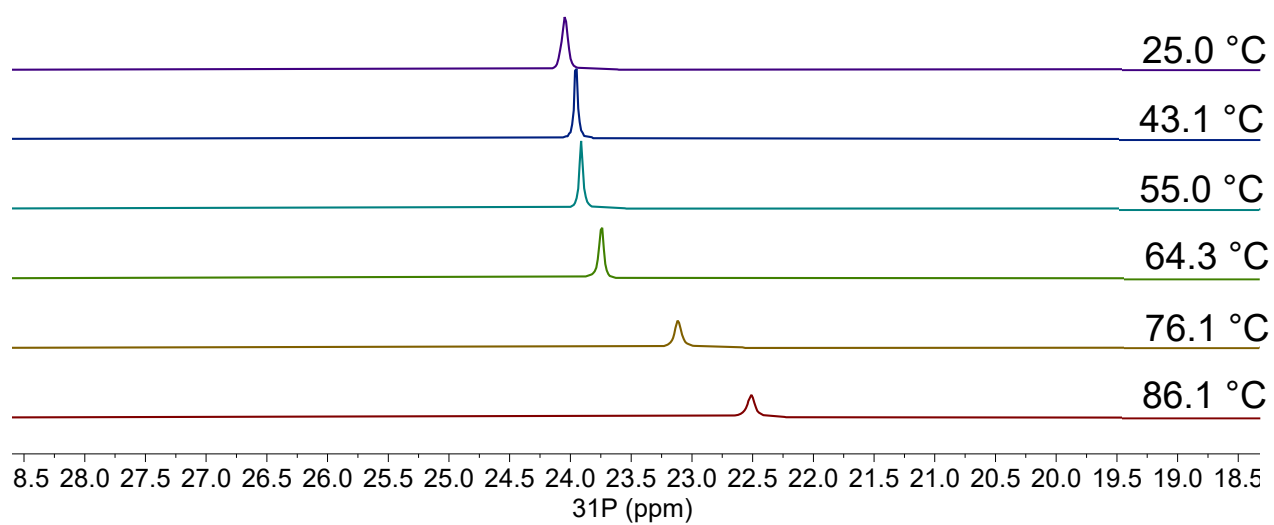

**Figure S18:** Variable temperature  $^{31}\text{P}\{^1\text{H}\}$  NMR spectrum (128 MHz, toluene- $d_8$ ) of 10.5 mM solution of **1-N<sub>2</sub>** under 1 atm N<sub>2</sub>.



Determination of  $K_{H_2}$  via  $^{31}\text{P}$  NMR spectra

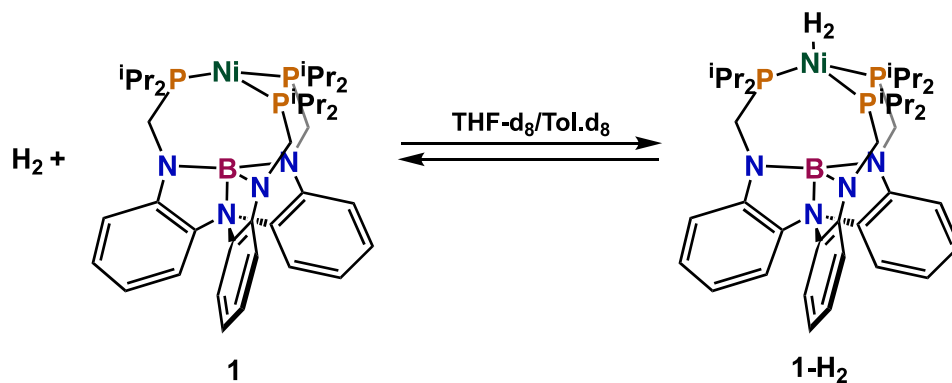

Figure S19: The equilibria between **1** and **1-H<sub>2</sub>**.

As done previously,<sup>12</sup> the value of  $K_{H_2}$  was calculated by using the equation 1, where X is a gaseous ligand. The values used where 31.4 ppm is the observed average shift at room temperature of **1-H<sub>2</sub>** in THF-*d*<sub>8</sub> under 1 atm H<sub>2</sub>, 32.1 is the shift of **1-H<sub>2</sub>** measured under 4 atm H<sub>2</sub> at -65 °C, and 15.8 is the shift of **1** measured at room temperature under Ar.

$$K_{H_2} = \frac{[(X)NiML]}{[NiML] P(X)} = \frac{\delta_{obs} - \delta_{NiML}}{\delta_{(X)NiML} - \delta_{obs}} \cdot \frac{1}{P(X)} \quad (S1)$$

The concentration of the gaseous ligand, as represented as P(X), can either be expressed as the known pressure of the gas or through the empirically-determined gas concentration in organic solvents.<sup>13,14</sup>

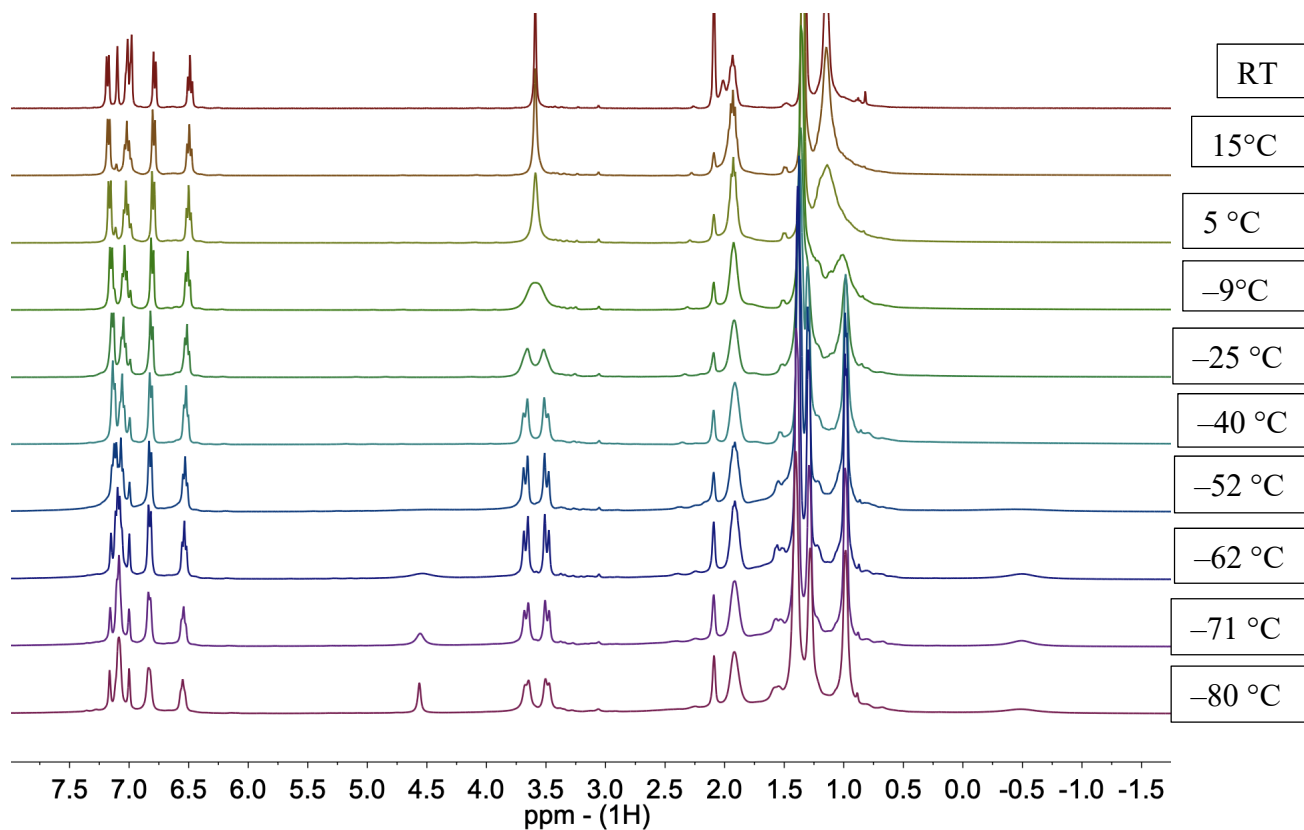

**Figure S20:** Variable temperature  $^1\text{H}$  NMR spectra of  $\mathbf{1-H}_2$  dissolved in  $\text{toluene-}d_8$  under 4 atm  $\text{H}_2$ .

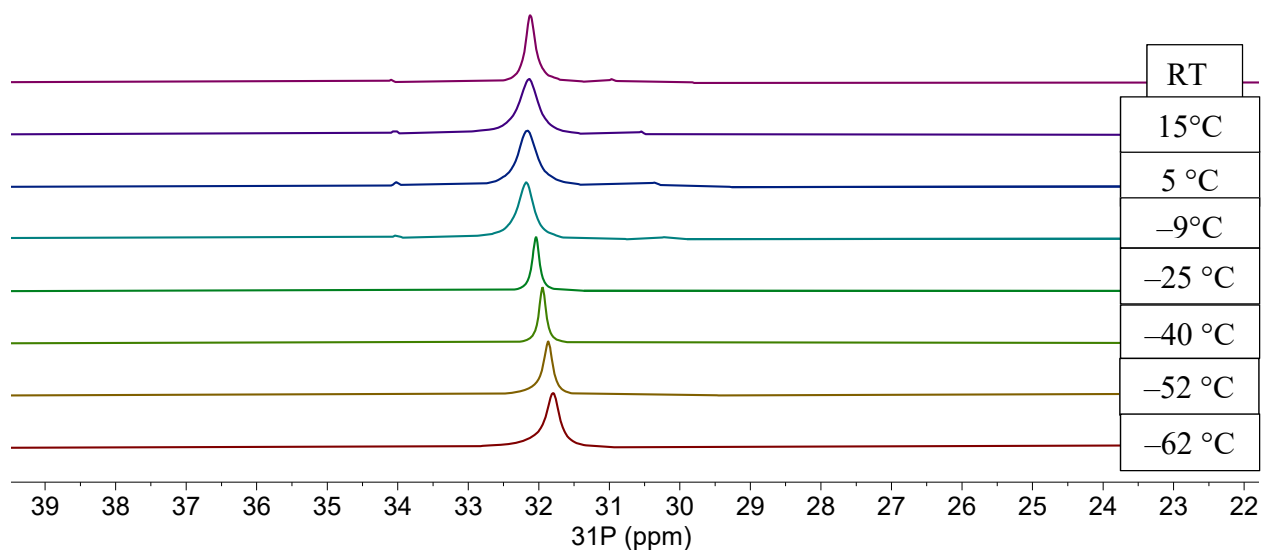

**Figure S21:** Variable temperature  $^{31}\text{P}$  NMR spectra of  $\mathbf{1-H}_2$  dissolved in  $\text{toluene-}d_8$  under 4 atm  $\text{H}_2$ . The chemical shift measured at 4 atm and RT was used to assign the shift of  $\mathbf{1-H}_2$ .

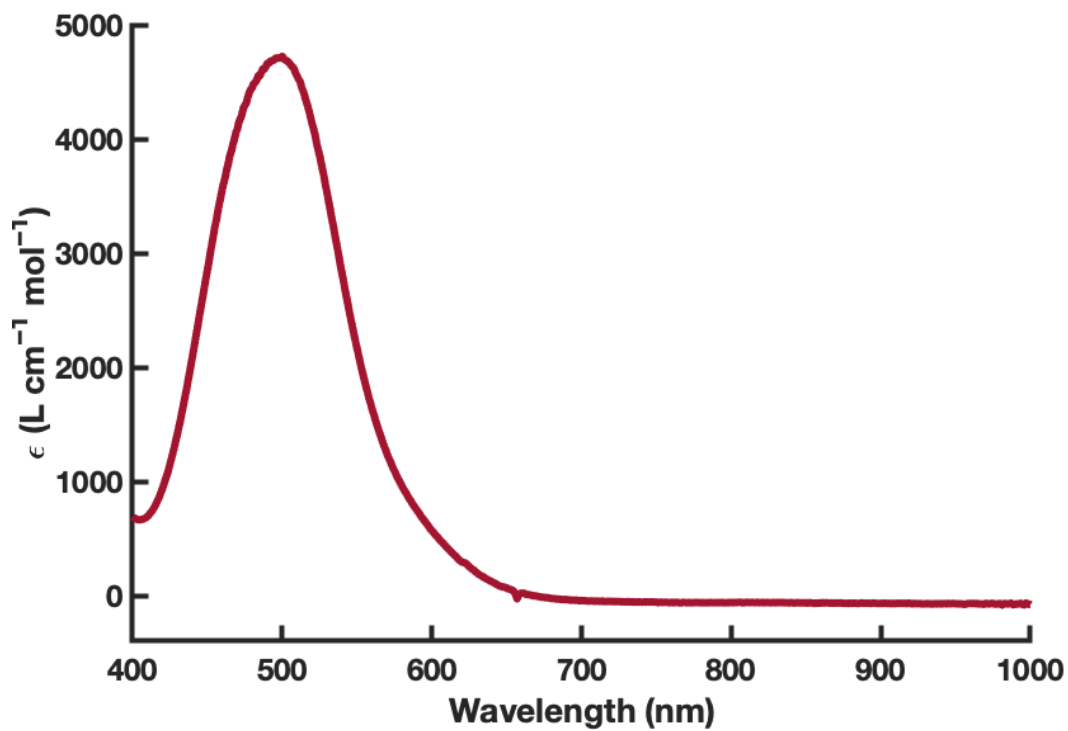

**Figure S22:** UV-Vis spectra of **1** under in THF under 1 atm Ar. THF,  $\lambda_{\text{max}}$  (nm),  $\epsilon$  ( $\text{M}^{-1}\text{cm}^{-1}$ ): 520 (4800).

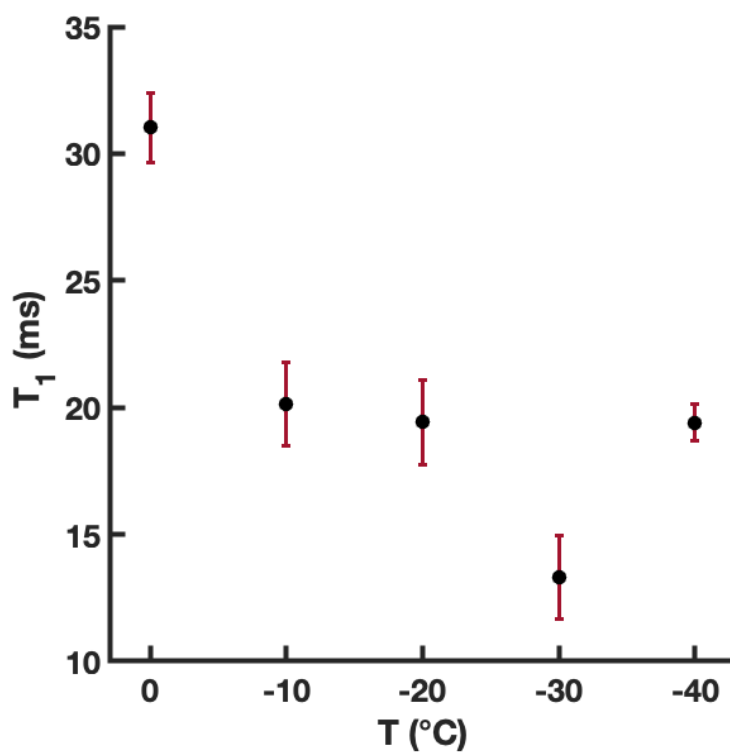

**Figure S23:** Variable temperature  $^1\text{H}$  NMR (400 MHz, THF- $d_8$ )  $T_1$  determination of the hydrogen ligand of **1-H<sub>2</sub>** under 1 atm  $\text{H}_2$ .

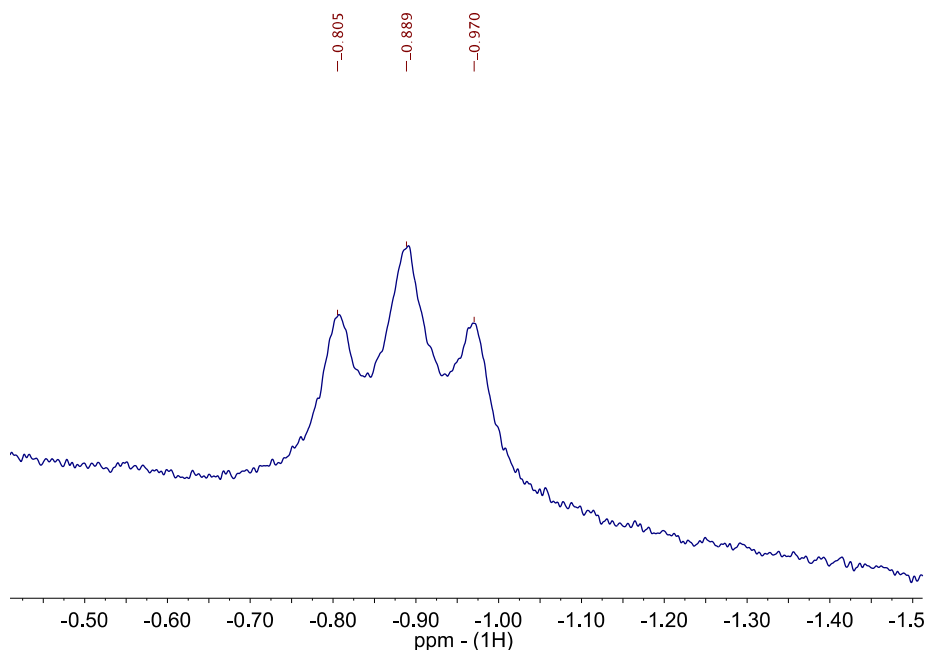

**Figure S24:** <sup>1</sup>H NMR spectrum (400 MHz, THF-*d*<sub>8</sub>) of 14.4 mM solution of **1** under 1 atm HD. Zoom of the hydride region showing  $J_{\text{HD}}$  of 33 Hz.

The relation of bond activation of an HD ligand is reflected in the magnitude of the coupling constant ( $J_{\text{HD}}$ ) of the signal in the <sup>1</sup>H NMR with the limiting case of a non-intact H–D bond (i.e. a classical dihydride) resulting in no significant coupling. A deviation from 43 Hz found for free HD gas indicates an activation of the bond, increasing the bond length from the 0.74 Å in the free gas. Both Morris and Heinekey have determined relationships for this correlation.<sup>8</sup>

$$d_{\text{HH}}[\text{Morris}] = 1.42 - 0.0167 \cdot J_{\text{HD}}$$

$$d_{\text{HH}}[\text{Heinekey}] = 1.44 - 0.0168 \cdot J_{\text{HD}}$$

Utilizing the lowest <sup>1</sup>H relaxation rates ( $T_1(\text{min})$ ) for the H<sub>2</sub> unit, a bond length can be determined. Whether the rotation of the hydrogen ligand about the H<sub>2</sub>–M bond is fast or static relative to the molecular tumbling in solution produces two possible limiting cases for the calculation of the H<sub>2</sub> bond length. The relationship between the bond length ( $d_{\text{HH}}$ ), the relaxation rate ( $T_1(\text{min})$ ), and the spectrometer frequency ( $\nu$ ) is shown below. To convert between a fast rotation or static case a constant can be used ( $C = 0.793$ ).<sup>9–11</sup> As shown in Table S4, the fast timescale aligns with the values calculated from the observed  $J_{\text{HD}}$ .

$$d_{\text{HH}}(\text{fast}) = 5.81 \cdot \sqrt[6]{T_1(\text{min})/(4\nu)}$$

$$d_{\text{HH}}(\text{static}) = \frac{d_{\text{HH}}}{C}$$

**Table S4:** Comparison of the H<sub>2</sub> activation parameters for the H<sub>2</sub> or HD adducts of the NiML series, where M = B (1), Al (2), Ga (3), and In (4). Pressure is 1 atm unless otherwise specified.

| Metric                                                    | 1                  | 2                    | 3                    | 4                  |
|-----------------------------------------------------------|--------------------|----------------------|----------------------|--------------------|
| $J_{\text{HD}}$ , Hz                                      | 33                 | 34.4 <sup>a</sup>    | 33.2                 | 32                 |
| $T_1(\text{min})$ , ms                                    | 13(2) <sup>b</sup> | ≤ 49(5) <sup>c</sup> | ≤ 16(6) <sup>d</sup> | 23(5) <sup>d</sup> |
| $d_{\text{H-H}}$ from $J_{\text{HD}}$ ,<br>Å              | 0.88               | 0.86                 | 0.88                 | 0.91               |
| <i>Heinekey</i>                                           |                    |                      |                      |                    |
| $d_{\text{H-H}}$ from<br>$T_1(\text{min})$<br><i>fast</i> | 0.83               | ≤ 0.99 <sup>c</sup>  | ≤ 0.80(5)            | 0.85(3)            |

<sup>a</sup>3.8 atm. <sup>b</sup>400 MHz. <sup>c</sup>500 MHz, 34 atm. <sup>d</sup>600 MHz. See reference 12 for more details.

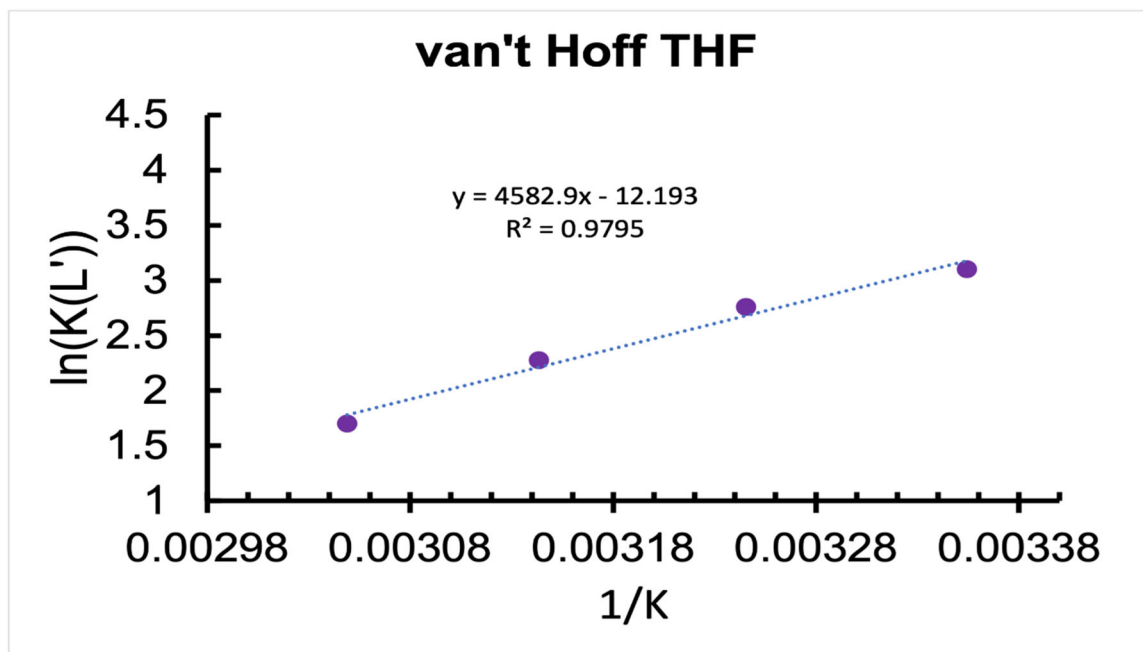

**Figure S25:** The van't Hoff plot of **1-H<sub>2</sub>** from the NMR spectrum in THF-*d*<sub>8</sub> at elevated temperatures.

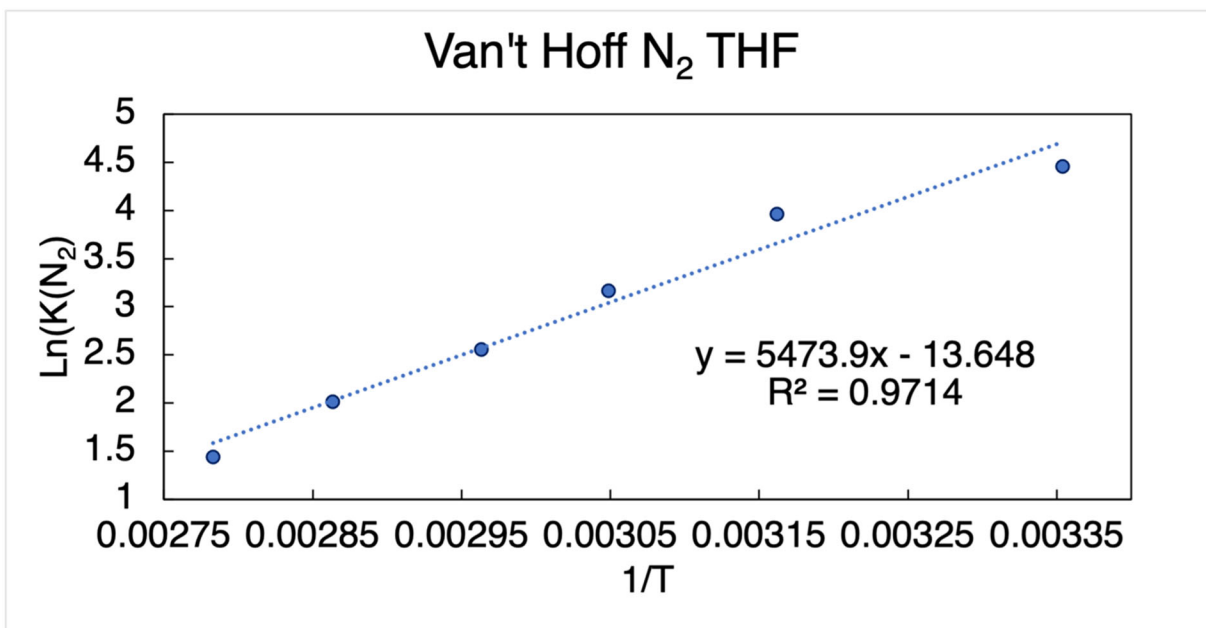

**Figure S26:** The van't Hoff plot of 1-N<sub>2</sub> from the NMR spectrum in toluene-*d*<sub>8</sub> at elevated temperatures.

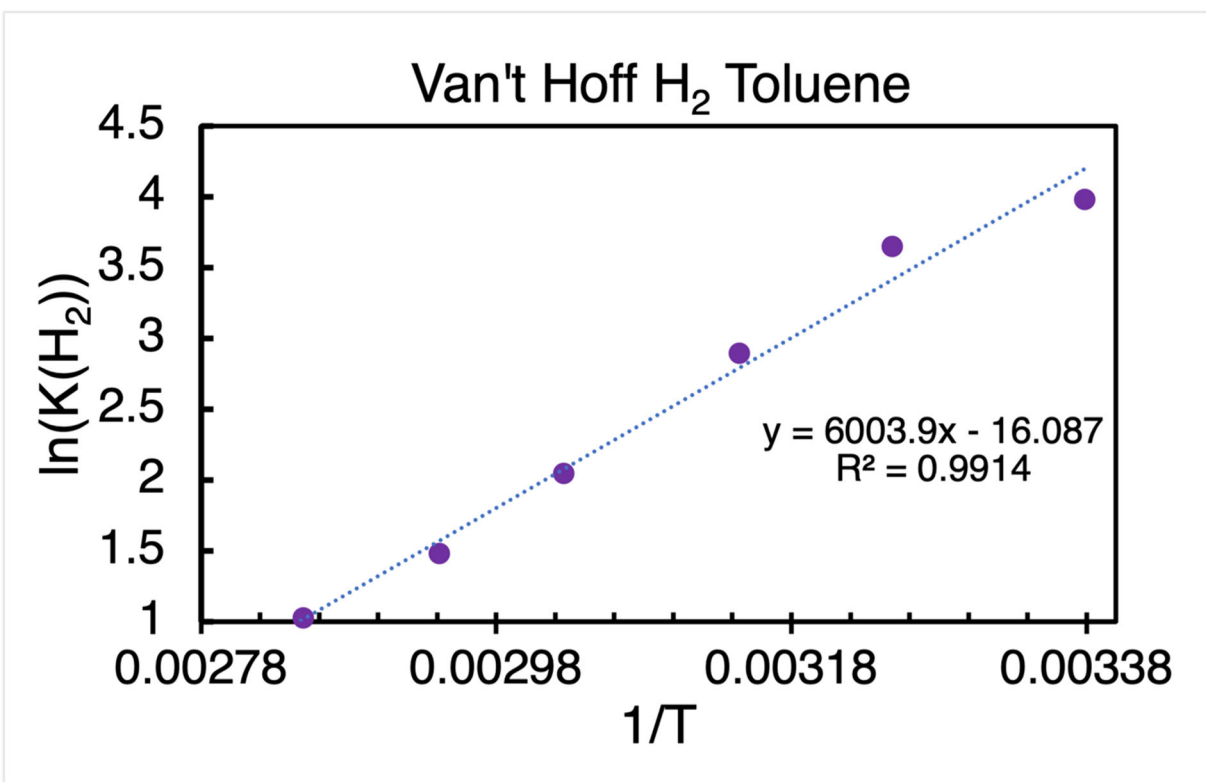

**Figure S27:** The van't Hoff plot of 1-H<sub>2</sub> from the NMR spectrum in toluene-*d*<sub>8</sub> at elevated temperatures.

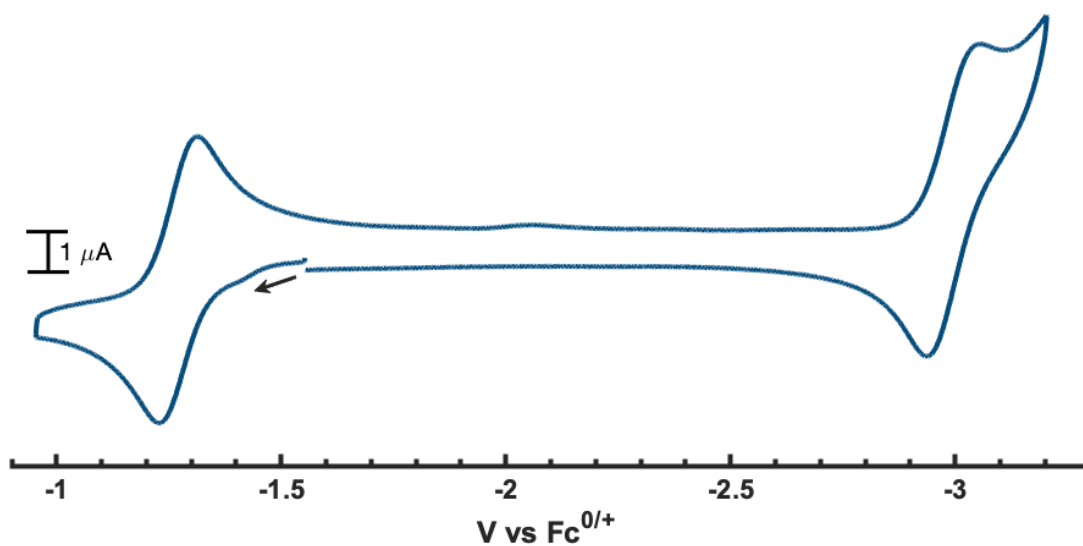

**Figure S28:** Cyclic voltammogram of **1**. Conditions: 4 mM **1** in THF under Ar, 0.4 M TBA PF<sub>6</sub>, 200 mV/s scan rate.

**Table S5:** Comparison of the electrochemical [NiML]<sup>0/+</sup> and [NiML]<sup>-/0</sup> redox potentials (V vs. Fc<sup>+0</sup>) and <sup>31</sup>P NMR shifts (ppm) of NiLH<sub>3</sub>, **1**, **2**, **3**, and **4** in THF.

|                       | NiLH <sub>3</sub> | <b>1</b> | <b>2</b> | <b>3</b> | <b>4</b>   |
|-----------------------|-------------------|----------|----------|----------|------------|
| [NiML] <sup>0/+</sup> | -1.02             | -1.26    | -0.74    | -0.57    | Ca. -0.39* |
| [NiML] <sup>0/-</sup> | N/A               | -3.00    | -2.82    | -2.48    | -2.34**    |
| <sup>31</sup> P δ     | 30.2              | 17.5     | 31.6     | 37.6     | 44.4       |

\*Irreversible oxidation, *i*<sub>pa</sub> used as a proxy. \*\*Quasi-reversible.

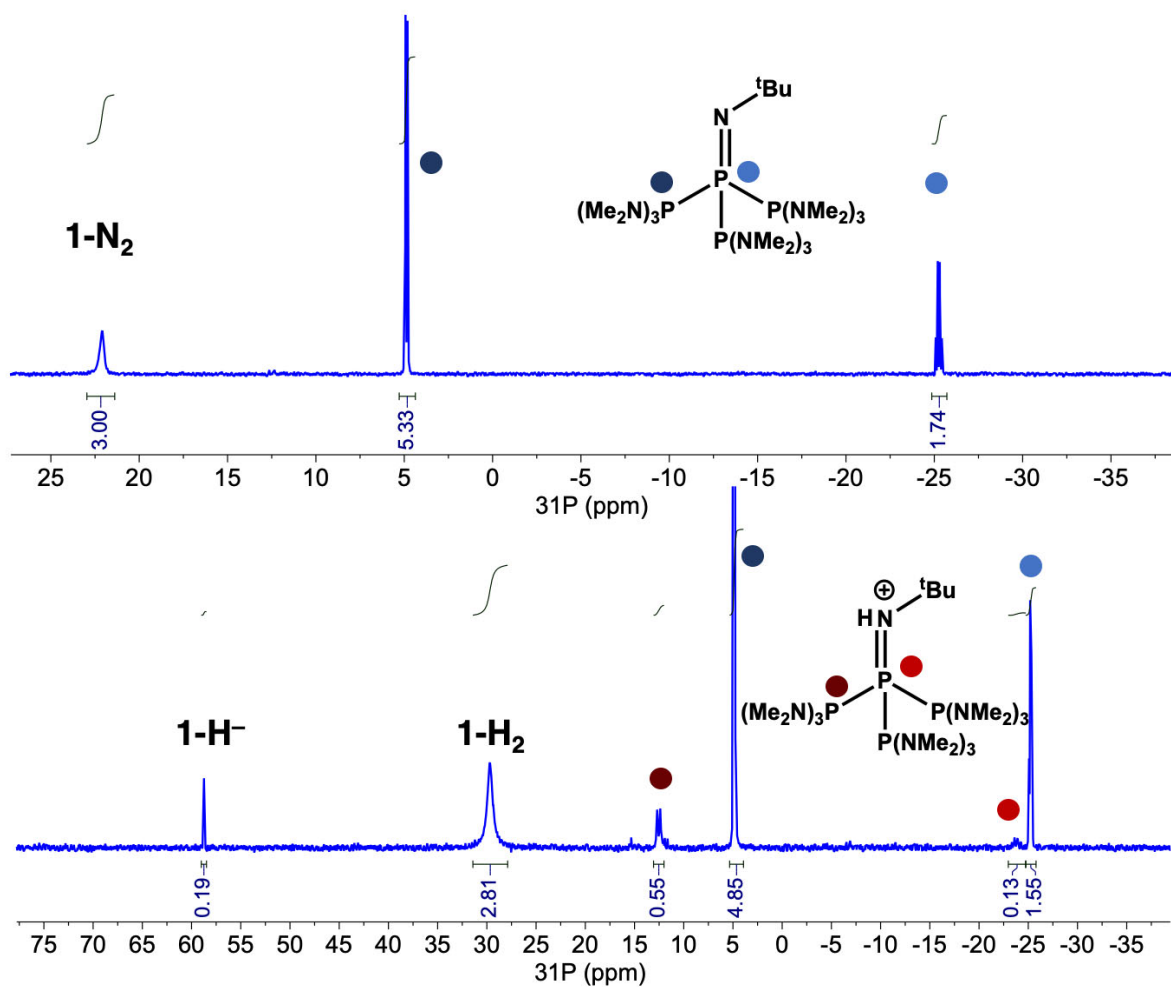

**Figure S29:** A representative example of the H<sub>2</sub> heterolysis reaction of **1-H<sub>2</sub>** and P<sub>4</sub><sup>t</sup>Bu in THF-*d*<sub>8</sub> starting from **1-N<sub>2</sub>** before (top) and after the addition of 1 atm H<sub>2</sub> (bottom), as monitored by  $^{31}\text{P}$  NMR spectroscopy.



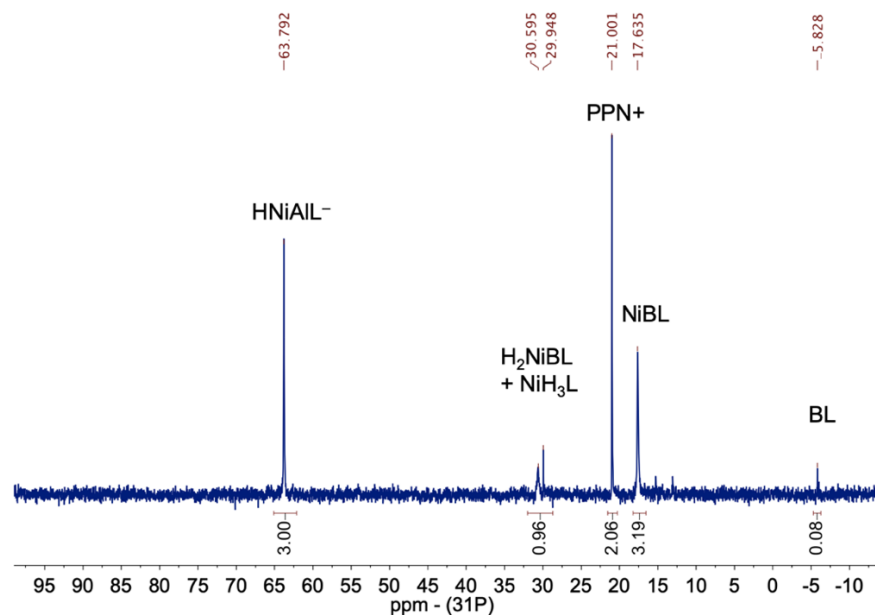

**Figure S30:** The observed reaction of **1** and [PPN][**2-H**<sup>-</sup>] in THF-*d*<sub>8</sub> over the span of three days resulting in no production of **1-H**<sup>-</sup>. After 3 days, some decomposition to BL, NiH<sub>3</sub>L, and H<sub>2</sub> (trapped as (H<sub>2</sub>)NiBL) was observed. PPN = bis(triphenylphosphine)iminium cation

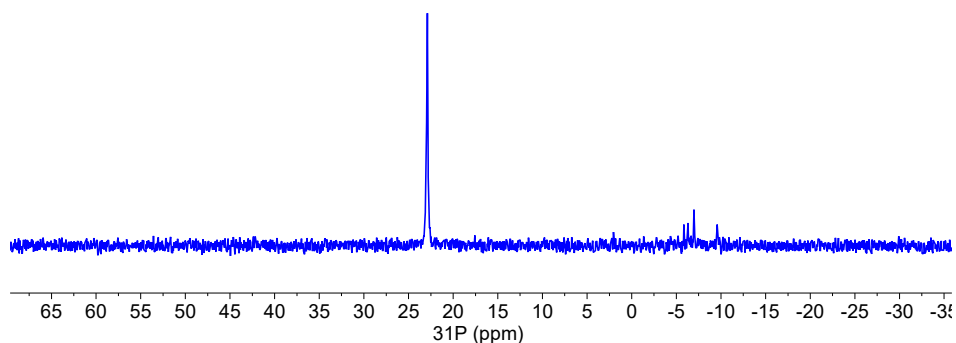

**Figure S31:** The <sup>31</sup>P NMR spectra of the reaction of **1-N**<sub>2</sub> and 1 equiv NaHB<sup>s</sup>Bu<sub>3</sub> in THF-*d*<sub>8</sub>. Note the signal of **1-N**<sub>2</sub> at 23 ppm and the lack of signal of **1-H**<sup>-</sup> indicate a lack of reactivity. The signals observed ~ -5 ppm are likely attributable to the reaction of NaHB<sup>s</sup>Bu with a minor impurity of BL decomposition.

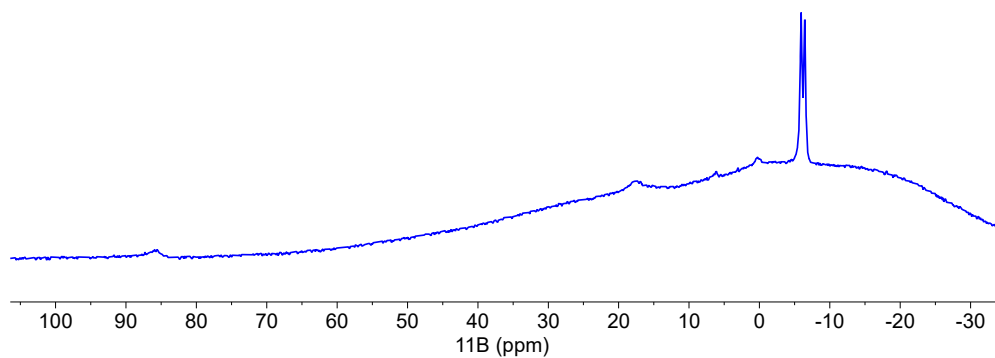

**Figure S32:** The <sup>1</sup>H NMR spectra of the reaction of **1-N**<sub>2</sub> and 1 equiv NaHB<sup>s</sup>Bu<sub>3</sub> in THF-*d*<sub>8</sub>. The signals at ~18 ppm and -8 ppm are attributable to **1-N**<sub>2</sub> and NaHB<sup>s</sup>Bu<sub>3</sub>, respectively. The other signals are likely the result to the reaction of NaHB<sup>s</sup>Bu with a minor impurity of BL.

### Calculation of the Thermodynamic Hydricity and Bond Dissociation Free Energy Values

Using the method of the combination of H<sub>2</sub> addition equilibria, pK<sub>a</sub>(H<sub>2</sub>) measurement, and the H<sub>2</sub> self-heterolysis constant, the thermodynamic hydricity, ΔG°<sub>H<sup>-</sup></sub>, of **1-H<sup>-</sup>** was determined.<sup>15</sup> For ΔG°<sub>H<sup>-</sup></sub> (THF) the binding equilibria of **1-H<sub>2</sub>**; pK<sub>a</sub> equilibria and **1-H<sub>2</sub>**, **1-H<sup>-</sup>**, phosphazene/-ium; and H<sub>2</sub> self-heterolysis were all measured in THF, so that only THF values were used for consistency.<sup>16,17</sup> Literature acetonitrile values were used for phosphazene pK<sub>a</sub> and the H<sub>2</sub> self-heterolysis constant to yield an expected thermodynamic hydricity for **1-H<sup>-</sup>** in acetonitrile.<sup>15,16</sup>

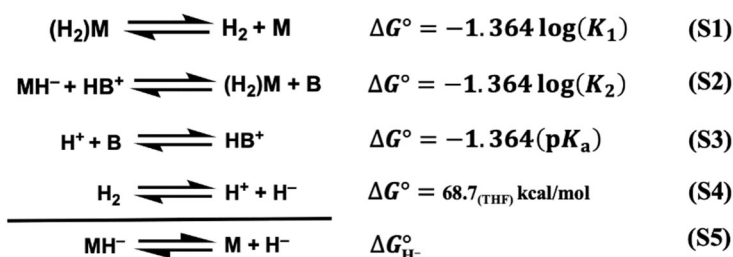

**Table S6:** The values used for the determination of ΔG°<sub>H<sup>-</sup></sub>.

| Value                                                                                    | THF           | CH <sub>3</sub> CN |
|------------------------------------------------------------------------------------------|---------------|--------------------|
| inverse of H <sub>2</sub> binding (K <sub>1</sub> )                                      | 0.0449        | 0.0449*            |
| inverse of proton transfer from Ni-H <sub>2</sub> to P <sup>4</sup> Bu (K <sub>2</sub> ) | 127.3         | 127.3*             |
| P <sup>4</sup> Bu pK <sub>a</sub>                                                        | 33.9          | 42.7               |
| H <sub>2</sub> self-heterolysis (kcal/mol)                                               | 68.7          | 76.0               |
| ΔG° <sub>H<sup>-</sup></sub>                                                             | 21.4 kcal/mol | 16.7 kcal/mol      |

\*measured in THF, presumed to be similar in CH<sub>3</sub>CN

**Table S7:** The values used for the determination of BDFE for **1-H<sup>-</sup>**. Note due to the insolubility of **1** in acetonitrile, its reduction potential in THF is used as a proxy: we have previously observed a minimal change in the potentials for the **2**, **3**, and **4** when changing between THF and acetonitrile. The value for E°<sub>1/2</sub> H<sup>-</sup>/H• (THF) was determined by combining the values of C<sub>G</sub>(THF)<sup>18</sup> and ΔG°<sub>H<sup>+</sup>/H<sup>-</sup></sub>(THF)<sup>17</sup>.

| Value                                                                  | THF           | CH <sub>3</sub> CN  |
|------------------------------------------------------------------------|---------------|---------------------|
| E° <sub>1/2</sub> (V vs Fc/Fc <sup>+</sup> )                           | -3.00         | -3.00*              |
| ΔG° <sub>H<sup>-</sup></sub> (kcal/mol)                                | 21.4          | 16.7                |
| E° <sub>1/2</sub> H <sup>-</sup> /H• (kcal/mol vs Fc/Fc <sup>+</sup> ) | -23.9         | -26.0 <sup>15</sup> |
| BDFE (kcal/mol)                                                        | 64.6 kcal/mol | 59.9 kcal/mol       |

\*measured in THF, presumed to be similar in CH<sub>3</sub>CN

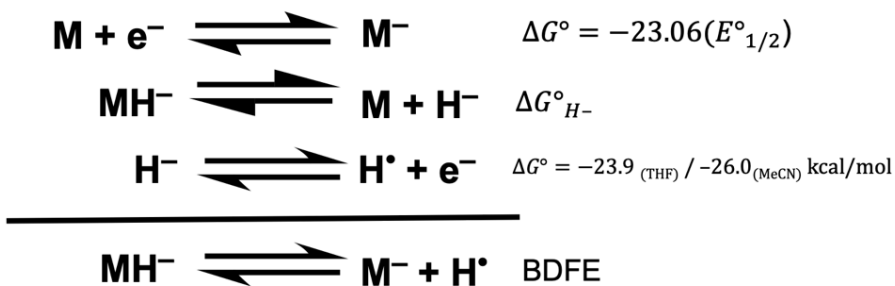

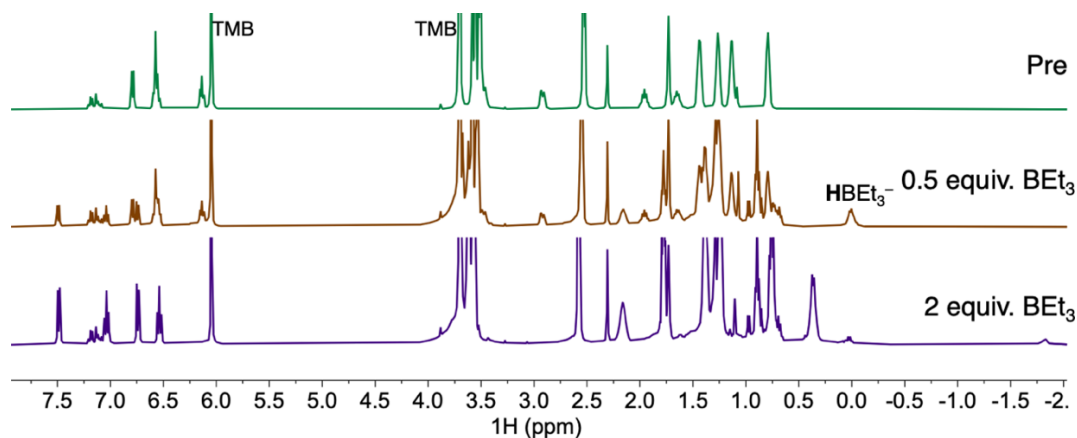

**Figure S33:** The  $^1\text{H}$  NMR spectra (400 MHz) monitoring the reaction of  $1\text{-H}^-$  and  $\text{BEt}_3$  in  $\text{THF-}d_8$  under Ar with 1,3,5-trimethoxybenzene (abbrev. TMB) as an internal standard. Each spectrum was taken within ten minutes of addition of reagent. Upon addition of excess  $\text{BEt}_3$  the hydridic signal for  $\text{HBEt}_3^-$  is diminished and a new signal at  $-1.8$  ppm as well as at  $0.3$  and  $0.76$  ppm corresponding to new ethyl moieties.

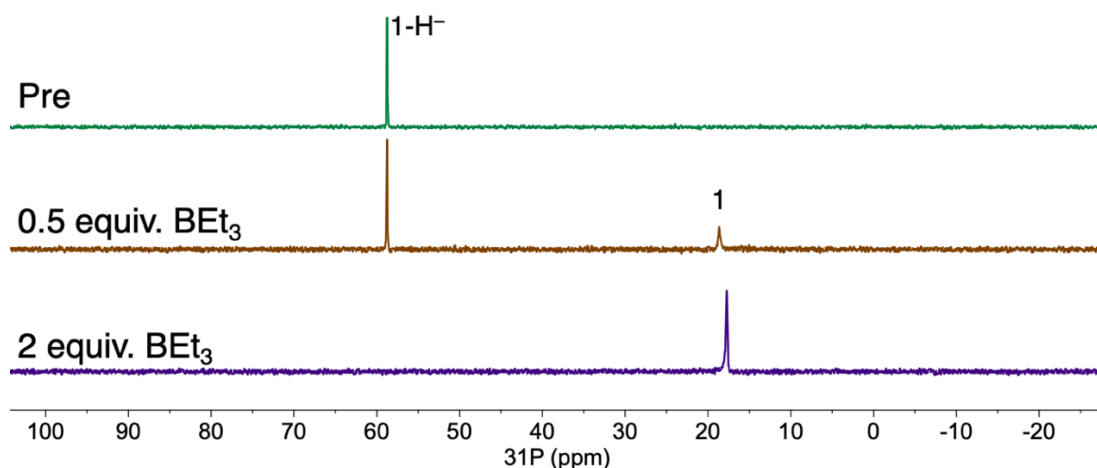

**Figure S34:** The  $^{31}\text{P}$  NMR spectra (162 MHz) monitoring the reaction of  $1\text{-H}^-$  and  $\text{BEt}_3$  in  $\text{THF-}d_8$ . Each spectrum was taken within ten minutes of addition of reagent.

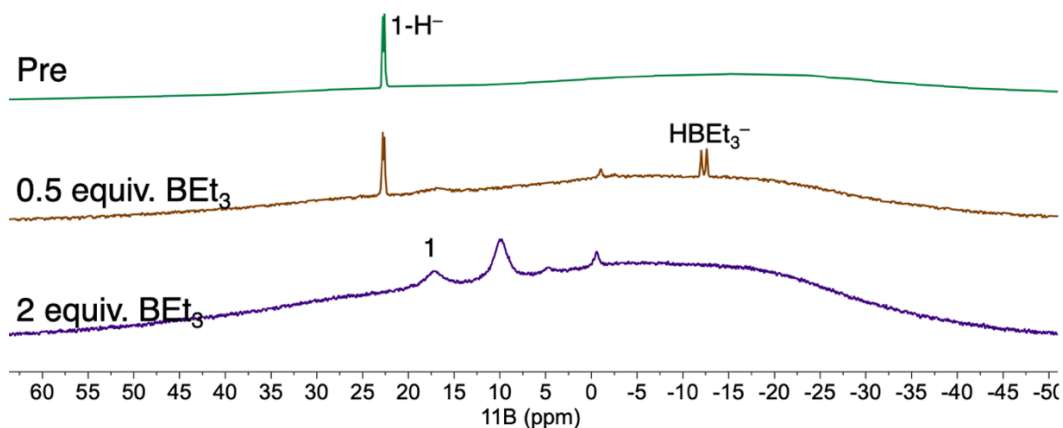

**Figure S35:** The  $^{11}\text{B}$  NMR spectra (128 MHz) monitoring the reaction of  $1\text{-H}^-$  and  $\text{BEt}_3$  in  $\text{THF-}d_8$ . Each spectrum was taken within ten minutes of addition of reagent. The signal at  $-0.1$  is a currently unknown minor impurity in the neat  $\text{BEt}_3$  reagent. The signal at ca.  $9$  ppm is currently an unknown byproduct of the reaction with excess  $\text{BEt}_3$ . Others have noted the combination of  $\text{BEt}_3$  and  $\text{HBEt}_3^-$  has potential for the

formation of  $\text{BEt}_3$  adducts<sup>19</sup> or to disproportionate to other products<sup>20</sup>. This signal does not correspond to known products from these reactions in the literature. It is clear that the addition of excess  $\text{BEt}_3$  results in the consumption of  $\mathbf{1-H}^-$  (with production of  $\mathbf{1}$ ) as well as the loss of the signal for  $\text{HBEt}_3$ .

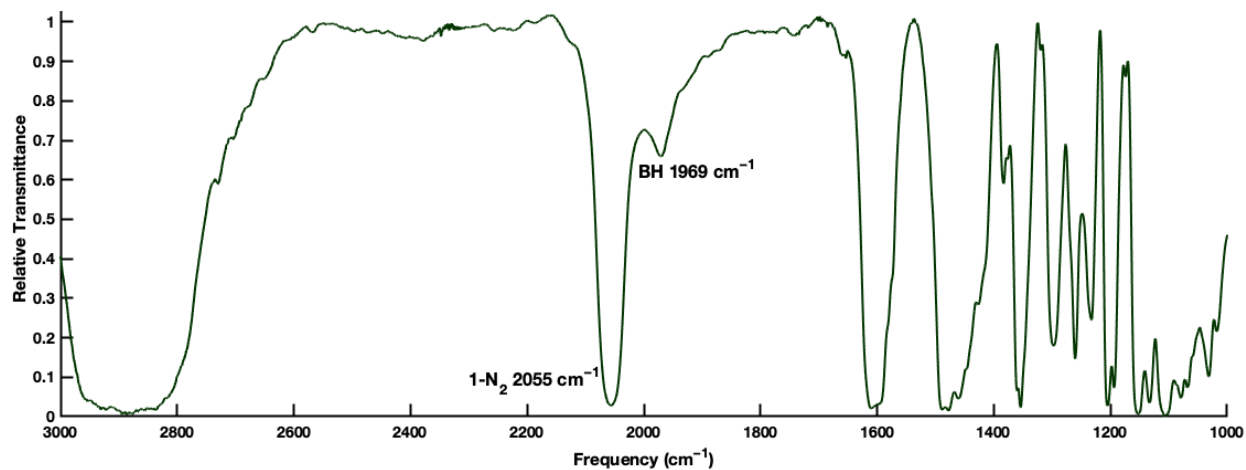

**Figure S36:** IR spectrum (KBr pellet) post-reaction of  $\mathbf{1-H}^-$  and 2 equiv.  $\text{BEt}_3$  after the NMR sample was brought into an  $\text{N}_2$  glovebox and volatiles were removed. Signals attributable to  $\mathbf{1-N}_2$  and the  $\text{HBEt}_3^-$  anion are apparent at  $2055\text{ cm}^{-1}$  and  $1969\text{ cm}^{-1}$  respectively.<sup>21</sup>

$^{31}\text{P}\{^1\text{H}\}$  NMR:

$\mathbf{1-H}^- + 1$  equiv.  $\text{BEt}_3$

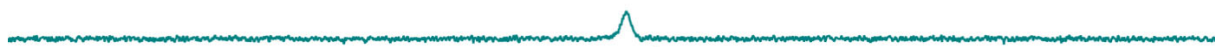

$^{31}\text{P}\{^1\text{H}\}$  NMR:

$\mathbf{1-H}^- + 1$  equiv.  $\text{BEt}_3$ , Dried

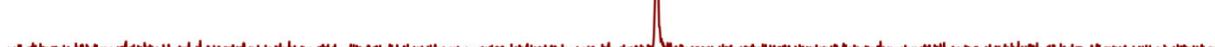

60 55 50 45 40 35 30 25 20 15 10 5 0 -5 -10 -15 -20  
 $^{31}\text{P}$  (ppm)

**Figure S37:** (Top) The  $^{31}\text{P}\{^1\text{H}\}$  NMR spectrum (162 MHz) of the reaction of  $\mathbf{1-H}^-$  and 1 equiv.  $\text{BEt}_3$  in  $\text{THF-d}_8$  under Ar, taken ca. ten minutes after addition of borane. (Bottom) The  $^{31}\text{P}\{^1\text{H}\}$  NMR spectrum of the dried and reconstituted ( $\text{THF-d}_8$ , Ar) reaction of  $\mathbf{1-H}^-$  and 1 equiv.  $\text{BEt}_3$ . Both spectra are consistent with  $\mathbf{1}$  as the only metal product.

$^{11}\text{B}$  NMR:

$\mathbf{1-H}^- + 1$  equiv.  $\text{BEt}_3$

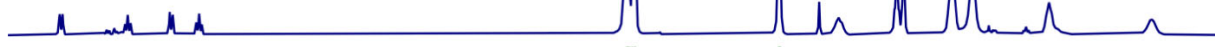

$^{11}\text{B}$  NMR:

$\mathbf{1-H}^- + 1$  equiv.  $\text{BEt}_3$ , Dried

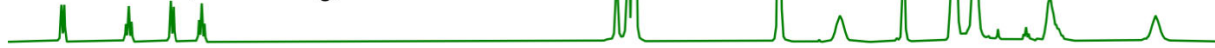

$^1\text{H}\{^{11}\text{B}\}$  NMR:

$\mathbf{1-H}^- + 1$  equiv.  $\text{BEt}_3$ , Dried

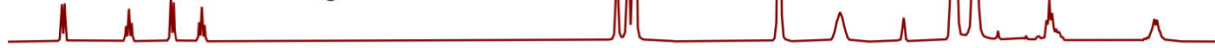

7.5 7.0 6.5 6.0 5.5 5.0 4.5 4.0 3.5 3.0 2.5 2.0 1.5 1.0 0.5 0.0  
 $^1\text{H}$  (ppm)

**Figure S38:** (Top) The  $^1\text{H}$  NMR spectrum (400 MHz) of the reaction of  $\mathbf{1-H}^-$  and 1 equiv.  $\text{BEt}_3$  in  $\text{THF-d}_8$  under Ar, taken ca. ten minutes after addition of borane. (Middle) The  $^1\text{H}$  NMR spectrum of the dried and reconstituted ( $\text{THF-d}_8$ , Ar) reaction of  $\mathbf{1-H}^-$  and 1 equiv.  $\text{BEt}_3$ . (Bottom) The  $^1\text{H}\{^{11}\text{B}\}$  NMR spectrum of the dried and reconstituted ( $\text{THF-d}_8$ , Ar) reaction of  $\mathbf{1-H}^-$  and 1 equiv.  $\text{BEt}_3$ . Note the signal for the anionic  $\text{HBEt}_3^-$  product is observable at ca. 0.0 ppm.

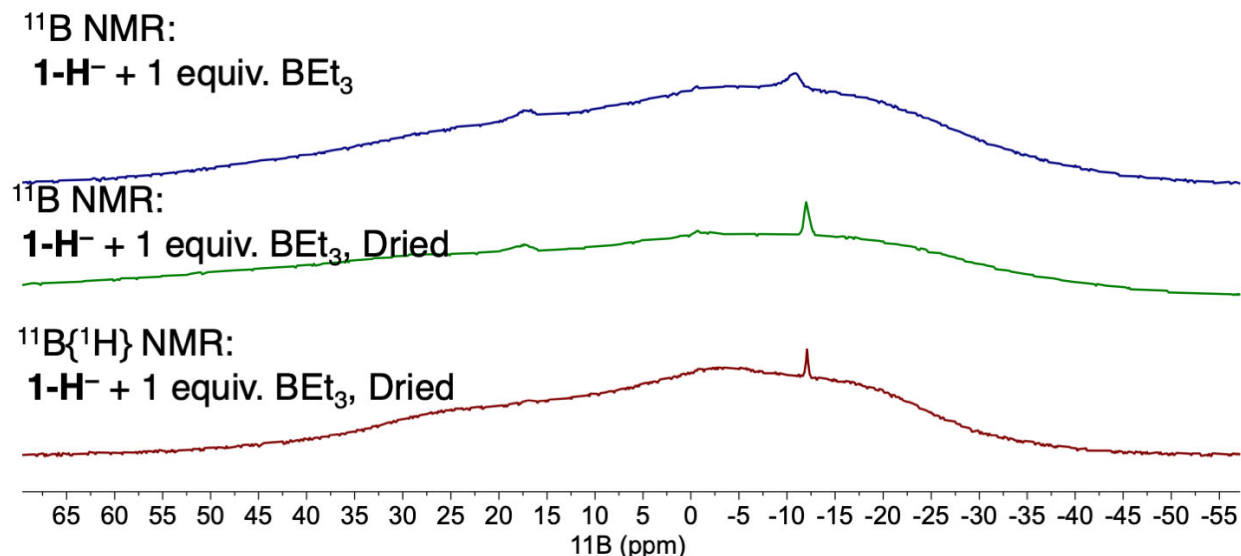

**Figure S39:** (Top) The <sup>11</sup>B NMR spectrum (128 MHz) of the reaction of **1-H<sup>-</sup>** and 1 equiv. BEt<sub>3</sub> in THF-*d*<sub>8</sub> under Ar, taken ca. ten minutes after addition of borane. (Middle) The <sup>11</sup>B NMR spectrum of the dried and reconstituted (THF-*d*<sub>8</sub>, Ar) reaction of **1-H<sup>-</sup>** and 1 equiv. BEt<sub>3</sub>. (Bottom) The <sup>11</sup>B{<sup>1</sup>H} NMR spectrum of the dried and reconstituted (THF-*d*<sub>8</sub>, Ar) reaction of **1-H<sup>-</sup>** and 1 equiv. BEt<sub>3</sub>. Note the signal for the anionic HBEt<sub>3</sub><sup>-</sup> product is observable at ca. 11 ppm. Unfortunately, the <sup>1</sup>H coupling of the hydride was not well resolved.

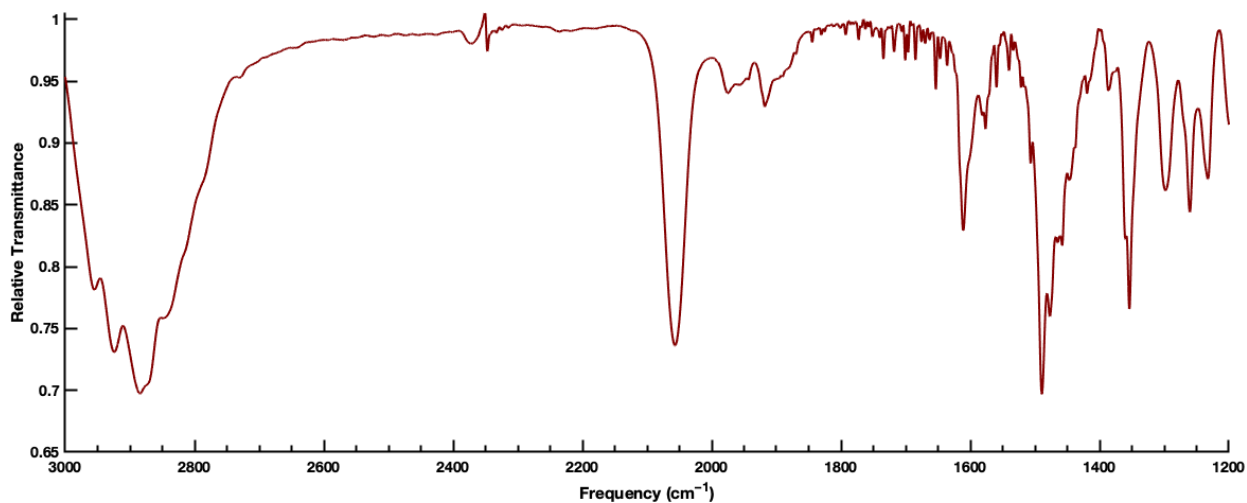

**Figure S40:** IR spectrum (KBr pellet) post-reaction of **1-H<sup>-</sup>** and 1 equiv. BEt<sub>3</sub> after the NMR sample was dried brought into an N<sub>2</sub> glovebox and volatiles were removed. Signals attributable to **1-N<sub>2</sub>** and the HBEt<sub>3</sub><sup>-</sup> anion are apparent at 2055 cm<sup>-1</sup> and 1969 cm<sup>-1</sup> respectively.<sup>21</sup>

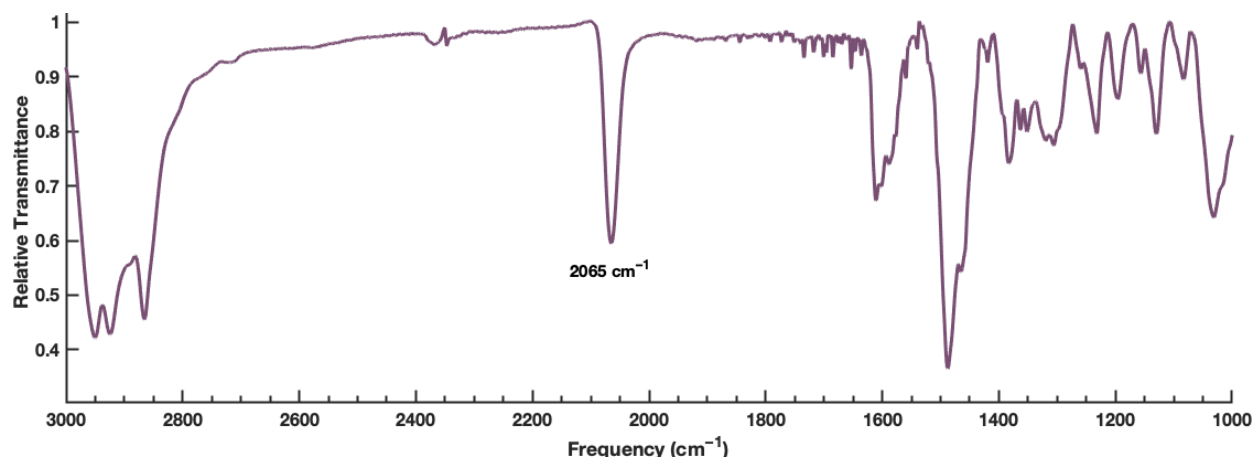

Figure S41: IR spectrum of 1-N<sub>2</sub>. (KBr pellet).

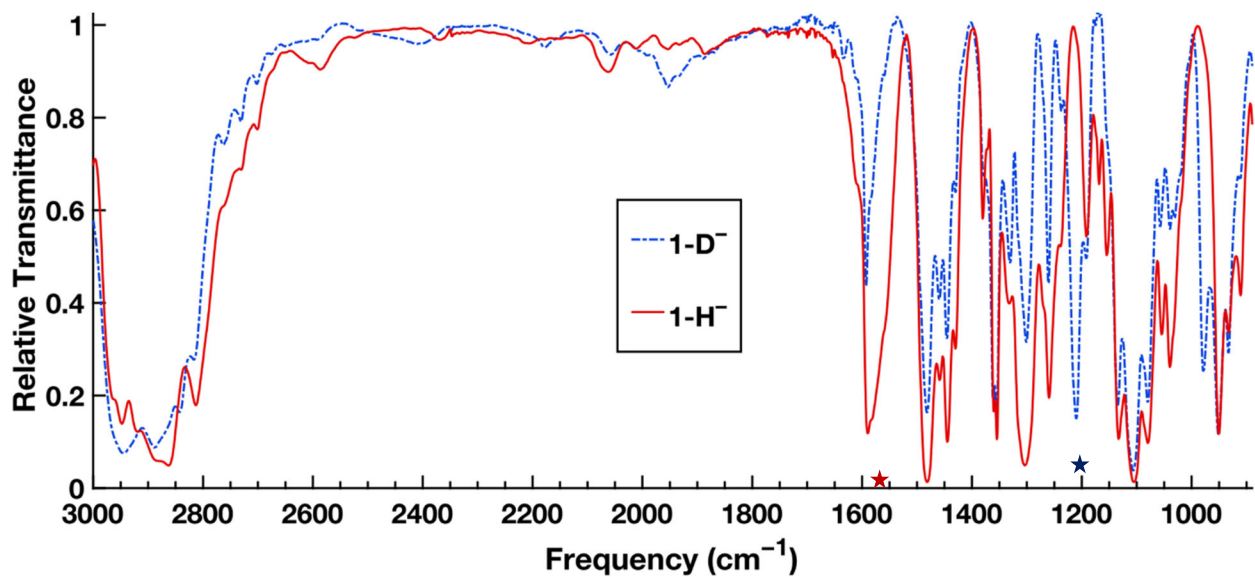

Figure S42: Comparison of IR spectra of crystalline samples 1-H<sup>-</sup> (red) and 1-D<sup>-</sup> (blue). (KBr pellet). The stretch observed at ca. 1600 cm<sup>-1</sup> is tentatively assigned to the Ni-H stretch for 1-H<sup>-</sup> and the Ni-D stretch of 1-D<sup>-</sup> red shifts to 1210 cm<sup>-1</sup> (as marked by stars).

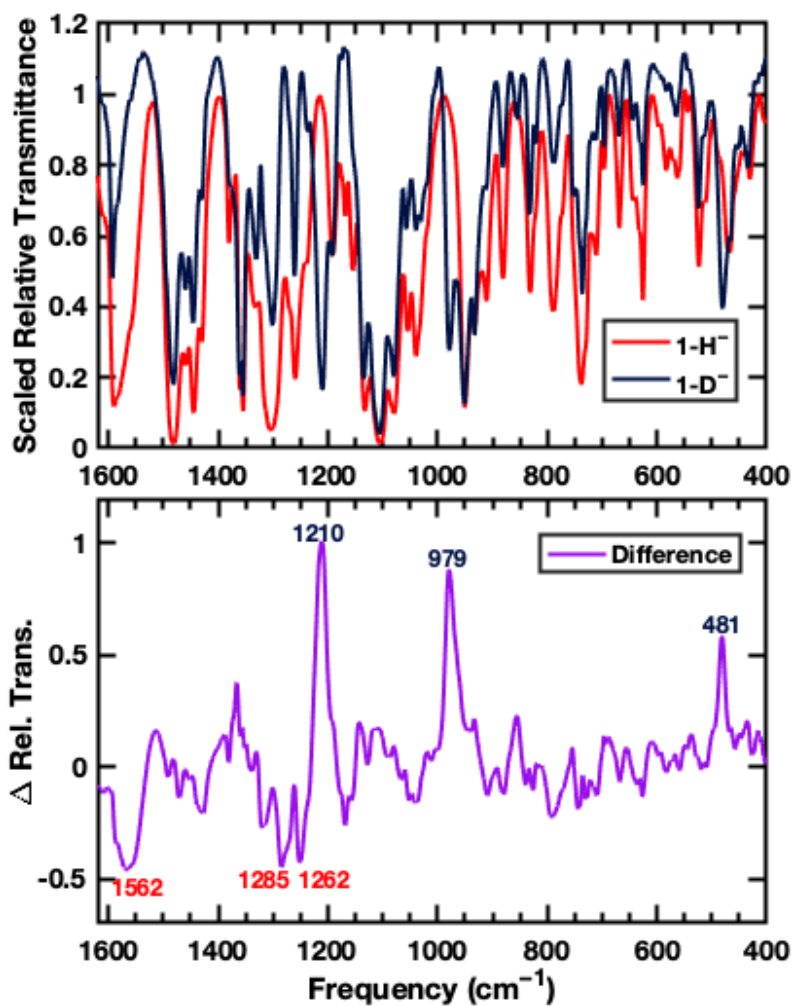

**Figure S43:** Top: the hydride and fingerprint region of IR spectra of  $1\text{-H}^-$  and  $1\text{-D}^-$  scaled to match intensities. Bottom: The difference spectrum between  $1\text{-H}^-$  and  $1\text{-D}^-$  to highlight any changes as the result of deuteration. Note, an ideal harmonic oscillator estimation would shift a Ni-H stretch of  $\sim 1565\text{ cm}^{-1}$  to  $\sim 1114\text{ cm}^{-1}$  upon deuteration (actual  $1210\text{ cm}^{-1}$ ).



**Table S8:** Collected thermodynamic values for **1**, **2**, **3**, and **4**.<sup>22,23</sup> Blue (left) boxes represent N<sub>2</sub> adducts, white (middle left) represent H<sub>2</sub> adducts, green (middle right) boxes represent the “naked” complexes, and the pink (right) boxes represent the anionic hydride adducts of the complexes.

| M                           | $\Delta H^\circ_{N_2}$<br>Tol. | $\Delta S^\circ_{N_2}$<br>Tol. | $\Delta G^\circ_{N_2}$<br>Tol. | $\Delta H^\circ_{H_2}$<br>THF | $\Delta S^\circ_{H_2}$<br>THF | $\Delta G^\circ_{H_2}$<br>THF | $\Delta H^\circ_{H_2}$<br>Tol. | $\Delta S^\circ_{H_2}$<br>Tol. | $\Delta G^\circ_{H_2}$<br>Tol. | pK <sub>a</sub> H <sub>2</sub><br>THF | pK <sub>a</sub> H <sub>2</sub><br>MeCN | $E^\circ_{1/2^{0/-}}$<br>THF | $E^\circ_{1/2^{0/+}}$<br>THF |
|-----------------------------|--------------------------------|--------------------------------|--------------------------------|-------------------------------|-------------------------------|-------------------------------|--------------------------------|--------------------------------|--------------------------------|---------------------------------------|----------------------------------------|------------------------------|------------------------------|
| B <sup>d</sup> ( <b>1</b> ) | -10.9(9)                       | -27(2)                         | -2.8(9)                        | -9.1(9)                       | -24(3)                        | -1.8(9)                       | -11.9(5)                       | -32(1)                         | -2.4(5)                        | 37.4(2)                               | 44.6(2)                                | -3.00                        | -1.26                        |
| Al ( <b>2</b> )             | -4.7(2) <sup>a</sup>           | -27.5(5) <sup>a</sup>          | 3.5(3) <sup>a</sup>            | –                             | –                             | –                             | -6.3(1) <sup>a</sup>           | -26.4(4) <sup>a</sup>          | 1.6(2) <sup>a</sup>            | 28.6(1) <sup>b</sup>                  | 36.7(1) <sup>b</sup>                   | -2.82 <sup>a</sup>           | -0.74 <sup>a</sup>           |
| Ga ( <b>3</b> )             | -4.7(3) <sup>c</sup>           | -23(1) <sup>c</sup>            | 2.1(5) <sup>c</sup>            | -7.5(1) <sup>c</sup>          | -25.4(5) <sup>c</sup>         | 0.1(1) <sup>c</sup>           | -6.3(1) <sup>c</sup>           | -23.0(7) <sup>c</sup>          | 0.6(2) <sup>c</sup>            | 25.3(3) <sup>c</sup>                  | 33.1(3) <sup>c</sup>                   | -2.48 <sup>c</sup>           | -0.57 <sup>c</sup>           |
| In ( <b>4</b> )             | -14.5(3) <sup>a</sup>          | -45(1) <sup>a</sup>            | -1.2(4) <sup>a</sup>           | –                             | –                             | –                             | -14.8(6) <sup>a</sup>          | -37(2) <sup>a</sup>            | -3.0(7) <sup>a</sup>           | 24.1(1) <sup>a</sup>                  | 31.9(1) <sup>a</sup>                   | -2.34 <sup>a</sup>           | Ca. -0.39 <sup>a</sup>       |

Free energies and enthalpies are given in kcal/mol, entropies are given in cal/mol•K, and electrochemical values are given in V vs. the ferrocene/ferrocenium couple. Except for the N<sub>2</sub> and H<sub>2</sub> binding studies done in toluene, all solution-state values were obtained in THF. The pK<sub>a</sub> and thermodynamic hydricity values in acetonitrile were extrapolated using the methods for phosphazene bases and metal complexes described in references 16 and 24, respectively. Electrochemical values for **1** were not able to be obtained in acetonitrile due to the compound’s insolubility in the solvent. However, as previously noted with **2-4**, the change in potentials between acetonitrile and THF is likely less than 100mV.<sup>12</sup> a) Cammarota, R. C. *et al. Chem. Sci.* **2019**, *10* (29), 7029–7042. b) Vollmer, M. V. Exploring Small Molecule Reactivity with Low-Valent Nickel and Cobalt Complexes Supported by Lewis Acidic Metalloligands, University of Minnesota, Minneapolis, Minnesota, U.S.A., 2019. c) Cammarota, R. C. *et al. J. Am. Chem. Soc.* **2017**, *139* (40), 14244–14250. d) This work.

**Table S9:** Collected thermodynamic values for **1-H<sup>-</sup>**, **2-H<sup>-</sup>**, **3-H<sup>-</sup>**, and **4-H<sup>-</sup>**.<sup>22,23</sup>

| <b>M</b>                    | $\Delta G^{\circ}_{\text{H}^-}$<br><b>THF</b> | $\Delta G^{\circ}_{\text{H}^-}$<br><b>MeCN</b> | <b>BDFE</b><br><b>THF</b> | <b>BDFE</b><br><b>MeCN</b> | $\nu_{\text{Ni-H}}$ |
|-----------------------------|-----------------------------------------------|------------------------------------------------|---------------------------|----------------------------|---------------------|
| B <sup>d</sup> ( <b>1</b> ) | 21.4(9)                                       | 16.7(9)                                        | 66.7                      | 59.9                       | 1562                |
| Al ( <b>2</b> )             | 31.8(1) <sup>b</sup>                          | 26.2(1) <sup>b</sup>                           | 72.9 <sup>b</sup>         | 64.9 <sup>b</sup>          | 1646 <sup>b</sup>   |
| Ga ( <b>3</b> )             | 34.7(5) <sup>c</sup>                          | 31.3(5) <sup>c</sup>                           | 58.6 <sup>b</sup>         | 62.5 <sup>b</sup>          | 1696 <sup>c</sup>   |
| In ( <b>4</b> )             | 39.2(2) <sup>b</sup>                          | 37.5(2) <sup>b</sup>                           | 62.0 <sup>b</sup>         | 65.5 <sup>b</sup>          | 1714 <sup>b</sup>   |

Free energies are given in kcal/mol and stretching frequencies are given in  $\text{cm}^{-1}$ . All solution state values were obtained in THF. Thermodynamic hydricity values in acetonitrile were extrapolated using the methods for metal complexes described in reference 24. a) Cammarota, R. C. *et al. Chem. Sci.* **2019**, *10* (29), 7029–7042. b) Vollmer, M. V. Exploring Small Molecule Reactivity with Low-Valent Nickel and Cobalt Complexes Supported by Lewis Acidic Metalloligands, University of Minnesota, Minneapolis, Minnesota, U.S.A., 2019. c) Cammarota, R. C. *et al. J. Am. Chem. Soc.* **2017**, *139* (40), 14244–14250. d) This work.

## Computational Details

Density functional theory (DFT) calculations were performed with Gaussian 09 software.<sup>29</sup> Geometries were optimized in the gas phase with the M06-L functional and the following basis sets: def2-TZVPP for Ni; def2-TZVP for N, P, B, and O; def2-SVP basis set for any invariant C and H atoms.<sup>30</sup> The M06-L functional<sup>31</sup> and the above basis sets gave the best match to the experimental geometries. Structures were visualized using Chemcraft.<sup>32</sup> Harmonic vibrational frequencies were computed and confirmed the nature of all optimized structures (no imaginary frequencies).

**Table S10:** Selected bond lengths (Å) and angles (°) for optimized structure **1-H<sup>-</sup>** and its corresponding experimental crystal structure. Differences in bond lengths and angles between the charged and neutral species are reported for both theory and experiment.

| Parameter                               | 1-H <sup>-</sup>       |                    |                        |
|-----------------------------------------|------------------------|--------------------|------------------------|
| (Å, °, or cm <sup>-1</sup> )            | Exp.                   | M06-L              | Diff<br>(Exp. – M06-L) |
| Ni–B                                    | 2.235(2)               | 2.235              | 0.003                  |
| $r^b$                                   | 1.07                   | 1.07               | 0                      |
| Ni–H                                    | 1.56(2)                | 1.582              | –0.02                  |
| Ni–P                                    | 2.1451(5) <sup>a</sup> | 2.154 <sup>a</sup> | –0.009                 |
| B–N <sub>Amide</sub>                    | 1.576(3) <sup>a</sup>  | 1.577 <sup>a</sup> | –0.001                 |
| B–N <sub>Apical</sub>                   | 2.803(5)               | 2.770              | 0.03                   |
| ∠P–Ni–P                                 | 117.97(3) <sup>a</sup> | 117.4 <sup>a</sup> | 0.57                   |
| ∠N <sub>Eq</sub> –B–N <sub>Eq</sub>     | 112.03(3) <sup>a</sup> | 112.0 <sup>a</sup> | 0.03                   |
| ∑(∠P–Ni–P)                              | 354.0(3)               | 352.3              | 1.7                    |
| ∑(∠N <sub>Eq</sub> –B–N <sub>Eq</sub> ) | 336.08(2)              | 336.0              | 0.08                   |
| $\nu_{\text{Ni-H}}$                     | 1562                   | 1558               | 4                      |

<sup>a</sup>Average of three unique values. <sup>b</sup>Ratio of the Ni–B bond length to the sum of Ni and B covalent radii.

**Table S1:** Selected bond lengths (Å) and angles (°) for optimized structure **1** and its corresponding experimental crystal structure. Differences in bond lengths and angles between the charged and neutral species are reported for both theory and experiment.

| Parameter<br>(Å or °)                   | <b>1</b>          |                    |                        |
|-----------------------------------------|-------------------|--------------------|------------------------|
|                                         | Exp. <sup>b</sup> | M06-L              | Diff<br>(Exp. – M06-L) |
| Ni–B                                    | 3.380(4)          | 3.348              | 0.03                   |
| Ni–P                                    | 2.1381(5)         | 2.142 <sup>a</sup> | –0.004                 |
| B–N <sub>Amide</sub>                    | 1.5322(2)         | 1.532 <sup>a</sup> | –0.0002                |
| B–N <sub>Apical</sub>                   | 1.702(4)          | 1.692              | 0.01                   |
| ∠P–Ni–P                                 | 117.251(9)        | 117.3 <sup>a</sup> | –0.05                  |
| ∠N <sub>Eq</sub> –B–N <sub>Eq</sub>     | 117.26(7)         | 117.6 <sup>a</sup> | –0.34                  |
| ∑(∠P–Ni–P)                              | 351.75(9)         | 351.9              | –0.40                  |
| ∑(∠N <sub>Eq</sub> –B–N <sub>Eq</sub> ) | 351.78(7)         | 352.8              | –1.02                  |

<sup>a</sup>Average of three unique values. <sup>b</sup>Trigonal space groups only display one value by symmetry.

**Table S11:** Selected bond lengths (Å) and angles (°) for optimized structure **1-N<sub>2</sub>** and its corresponding experimental crystal structures Differences in bond lengths and angles between the charged and neutral species are reported for both theory and experiment.

| Parameter<br>(Å or °)                   | 1-N <sub>2</sub>       |                    |                        |
|-----------------------------------------|------------------------|--------------------|------------------------|
|                                         | Exp.                   | M06-L              | Diff<br>(Exp. – M06-L) |
| Ni–B                                    | 3.735(2)               | 3.703              | 0.003                  |
| Ni–N <sub>2</sub>                       | 1.820(9)               | 1.847              | –0.03                  |
| N–N                                     | 1.116(5)               | 1.120              | –0.004                 |
| Ni–P                                    | 2.2065(5) <sup>a</sup> | 2.219 <sup>a</sup> | –0.001                 |
| B–N <sub>Amide</sub>                    | 1.527(6) <sup>a</sup>  | 1.519 <sup>a</sup> | –0.001                 |
| B–N <sub>Apical</sub>                   | 1.682(3)               | 1.700              | –0.02                  |
| ∠P–Ni–P                                 | 109.67(4) <sup>a</sup> | 109.7 <sup>a</sup> | –0.03                  |
| ∠N <sub>Eq</sub> –B–N <sub>Eq</sub>     | 117.06(3) <sup>a</sup> | 117.4 <sup>a</sup> | –0.34                  |
| ∑(∠P–Ni–P)                              | 329.01(4)              | 329.2              | –0.19                  |
| ∑(∠N <sub>Eq</sub> –B–N <sub>Eq</sub> ) | 351.19(3)              | 352.2              | –1.01                  |

<sup>a</sup>Average of three unique values.

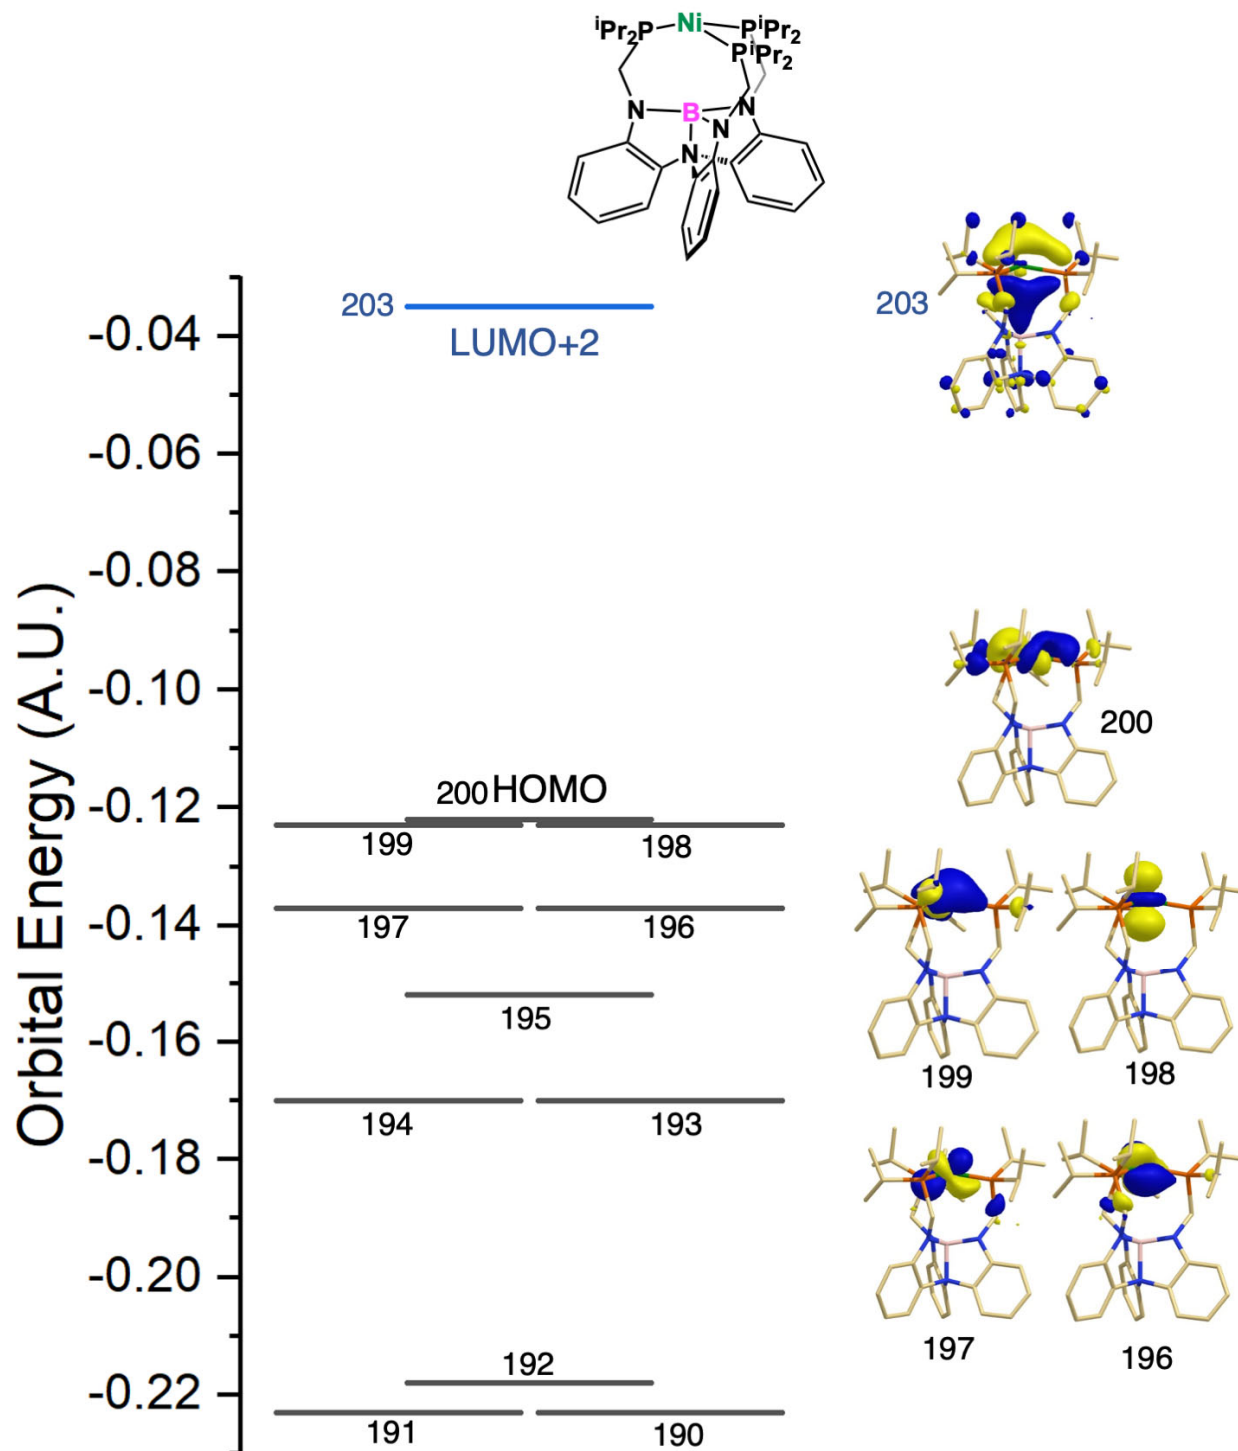

Figure S44: Kohn-Sham Orbitals of 1, plotted at an isovalue of 0.05.

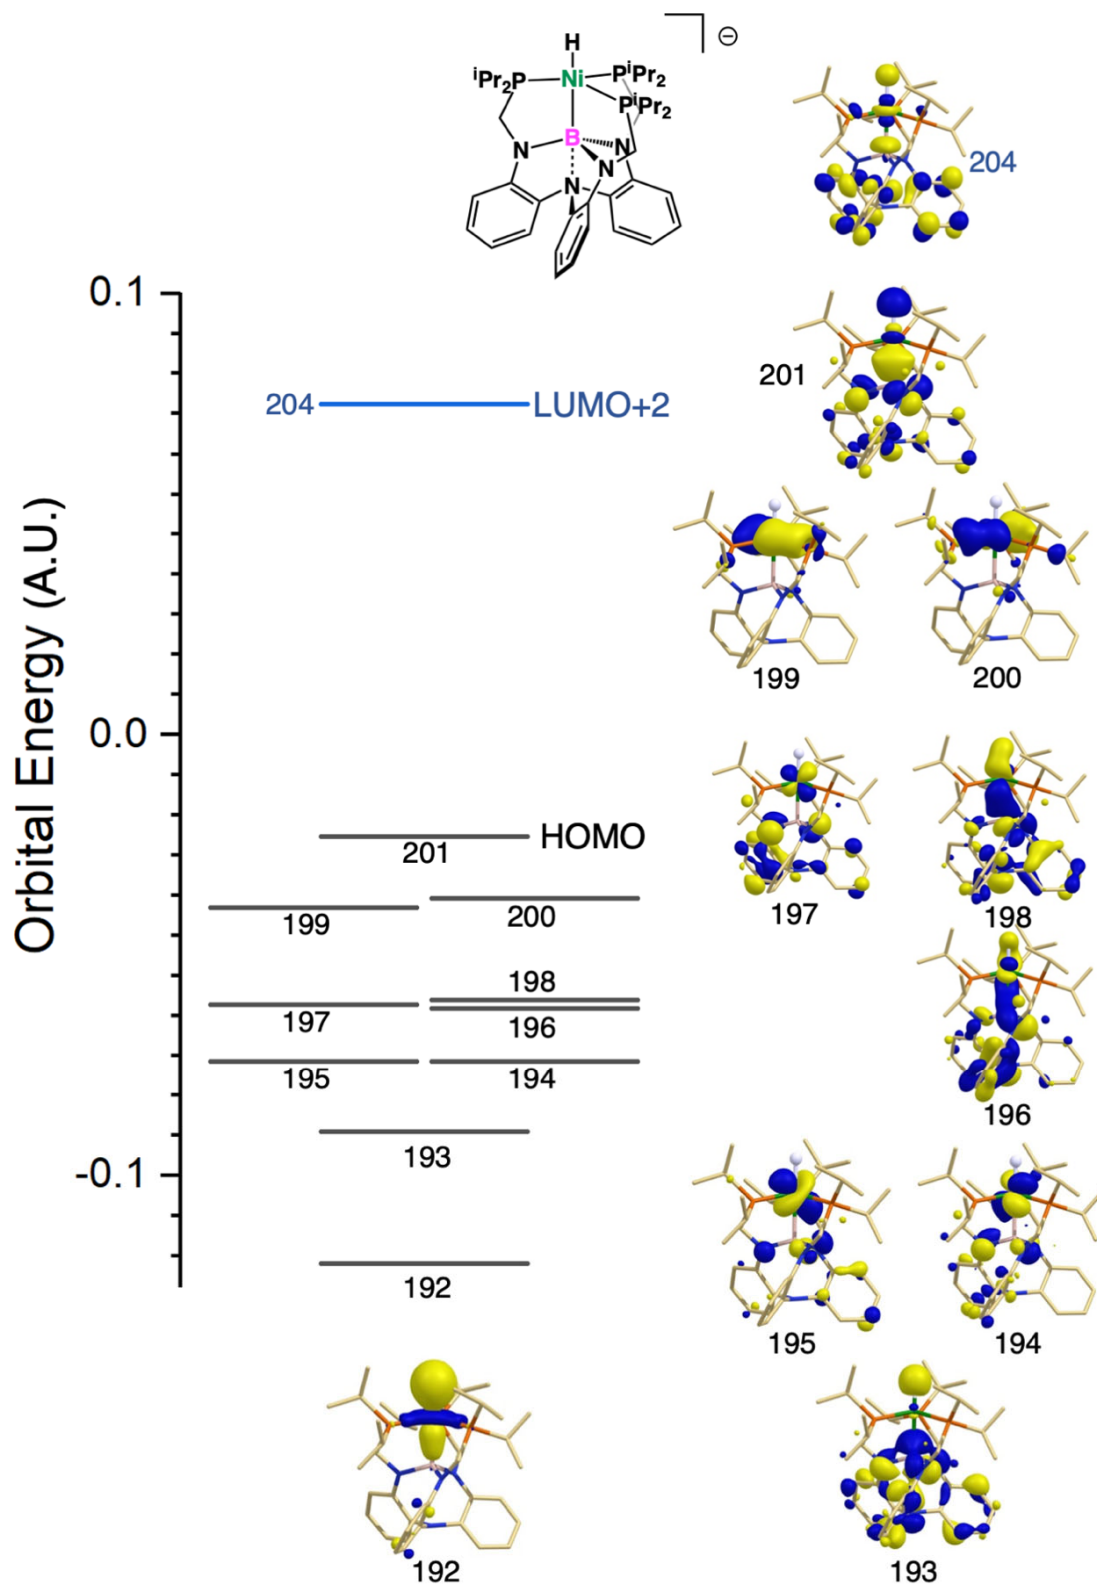

**Figure S45:** Kohn-Sham Orbitals of  $1\text{-H}^-$ , plotted at an isovalue of 0.05. The three MOs related to the 3-center (H-Ni-B), 2-electron  $\sigma$ -bond are labeled as 192, 201, and 204. The energy of the optimized  $1\text{-H}^-$  (-4298.1094375 Hartrees) is lower in energy than a hypothetical isomer where the Ni-B interaction is absent (-4298.0802393 Hartrees).

**Table S12:** The row-wise correlation matrix for various properties of **1**, **2**, **3**, and **4**; and their respective H<sub>2</sub> and hydride adducts.

|                          | Shannon Ionic Radii (IV) | Oxidation Potential | Reduction Potential | $\Delta G_{H^-}$ THF | <sup>31</sup> P Shift | pKa H <sub>2</sub> THF |
|--------------------------|--------------------------|---------------------|---------------------|----------------------|-----------------------|------------------------|
| Shannon Ionic Radii (IV) | 1.0000                   | 0.9978              | 0.9405              | 0.9987               | 0.9980                | -0.9770                |
| Oxidation Potential      | 0.9978                   | 1.0000              | 0.9404              | 0.9997               | 0.9982                | -0.9889                |
| Reduction Potential      | 0.9405                   | 0.9404              | 1.0000              | 0.9345               | 0.9571                | -0.9192                |
| $\Delta G_{H^-}$ THF     | 0.9987                   | 0.9997              | 0.9345              | 1.0000               | 0.9975                | -0.9863                |
| <sup>31</sup> P Shift    | 0.9980                   | 0.9982              | 0.9571              | 0.9975               | 1.0000                | -0.9820                |
| pKa H <sub>2</sub> THF   | -0.9770                  | -0.9889             | -0.9192             | -0.9863              | -0.9820               | 1.0000                 |

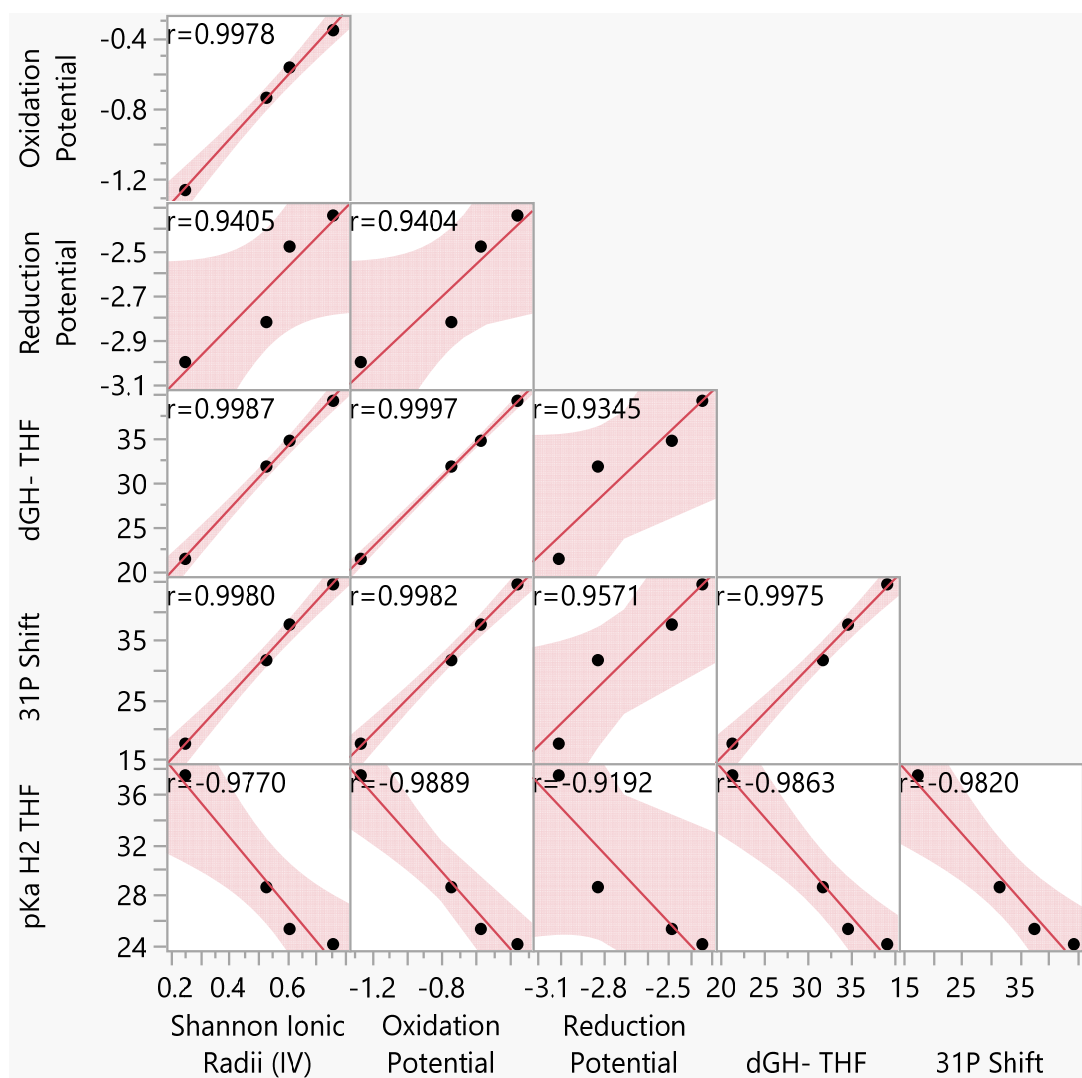

**Figure S46:** The scatterplot correlation matrix for various properties of **1**, **2**, **3**, and **4** used in Table S12.



**Table S13:** A comparison of the calculated enthalpy of hydride transfer values, literature thermodynamic hydricity values, the predicted hydricity values from a linear correlation between them (see Figure S47, below), and computationally predicted thermodynamic hydricity values. All values are in kcal/mol. <sup>a</sup>Values used from reference 25.

|                                  | R                             | Calc. $\Delta H_{H^-}$ MeCN <sup>a</sup> | Lit. $\Delta G_{H^-}$ MeCN <sup>a</sup> | Linear Correlation $\Delta G_{H^-}$ | Calculated $\Delta G_{H^-}$ <sup>a</sup> |
|----------------------------------|-------------------------------|------------------------------------------|-----------------------------------------|-------------------------------------|------------------------------------------|
| [BR <sub>3</sub> H] <sup>-</sup> | O <sup>t</sup> Bu             | 9.23                                     |                                         | 5.127                               | 0.62                                     |
|                                  | OSiMe <sub>3</sub>            | 15.41                                    |                                         | 10.79                               | 5.01                                     |
|                                  | <sup>s</sup> Bu               | 28.6                                     |                                         | 22.86                               | 19.99                                    |
|                                  | Et                            | 32.22                                    | 26                                      | 26.17                               | 24.39                                    |
|                                  | Ph                            | 42.22                                    | 36                                      | 35.33                               | 44.55                                    |
|                                  | F                             | 56.51                                    |                                         | 48.41                               | 49.1                                     |
|                                  | H                             | 58.15                                    | 50                                      | 49.91                               | 50.45                                    |
|                                  | C <sub>6</sub> F <sub>5</sub> | 71.18                                    |                                         | 61.84                               | 64.95                                    |
| AlH <sub>4</sub> <sup>-</sup>    | –                             | 50.82                                    | 43                                      | 43.20                               | 42.56                                    |

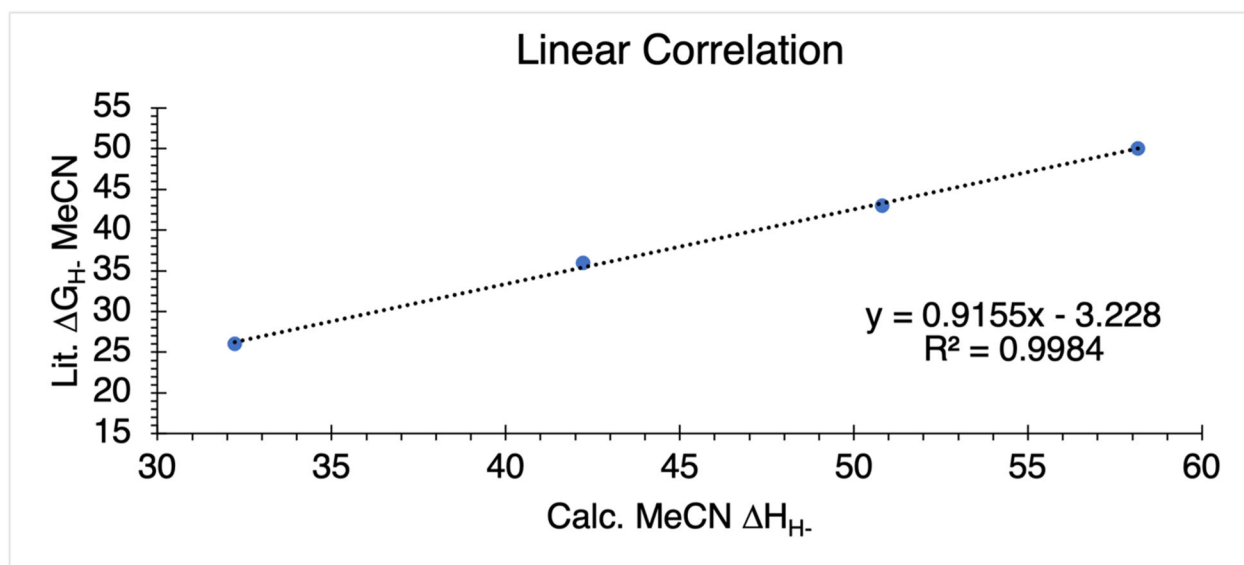

**Figure S47:** The plot between literature thermodynamic hydricity values and their respective computationally determined enthalpy of hydride transfer values. Values taken from reference 25. The produced equation allows for a semi-empirical method for interconverting calculated enthalpies of hydride transfer into predicted estimations of thermodynamic hydricities on the acetonitrile scale. Note the closer correlation to the literature values than the calculated thermodynamic hydricities enabling reasonable predictions at the extreme regimes.

## References

- (1) Rudd, P. A.; Liu, S.; Gagliardi, L.; Young, V. G.; Lu, C. C. Metal–Alane Adducts with Zero-Valent Nickel, Cobalt, and Iron. *J. Am. Chem. Soc.* **2011**, *133* (51), 20724–20727. <https://doi.org/10.1021/ja2099744>.
- (2) Prat, J. R.; Gaggioli, C. A.; Cammarota, R. C.; Bill, E.; Gagliardi, L.; Lu, C. C. Bioinspired Nickel Complexes Supported by an Iron Metalloligand. *Inorg. Chem.* **2020**, *59* (19), 14251–14262. <https://doi.org/10.1021/acs.inorgchem.0c02041>.
- (3) Blessing, R. H. An Empirical Correction for Absorption Anisotropy. *Acta Crystallogr. A* **1995**, *51* (1), 33–38. <https://doi.org/10.1107/S0108767394005726>.
- (4) Sheldrick, G. M. *SHELXT* – Integrated Space-Group and Crystal-Structure Determination. *Acta Crystallogr. Sect. Found. Adv.* **2015**, *71* (1), 3–8. <https://doi.org/10.1107/S2053273314026370>.
- (5) Hübschle, C. B.; Sheldrick, G. M.; Dittrich, B. *ShelXle* : A Qt Graphical User Interface for *SHELXL*. *J. Appl. Crystallogr.* **2011**, *44* (6), 1281–1284. <https://doi.org/10.1107/S0021889811043202>.
- (6) Sheldrick, G. M. Crystal Structure Refinement with *SHELXL*. *Acta Crystallogr. Sect. C Struct. Chem.* **2015**, *71* (1), 3–8. <https://doi.org/10.1107/S2053229614024218>.
- (7) Spek, A. L. Structure Validation in Chemical Crystallography. *Acta Crystallogr. D Biol. Crystallogr.* **2009**, *65* (2), 148–155. <https://doi.org/10.1107/S090744490804362X>.
- (8) Kubas, G. J. Fundamentals of H<sub>2</sub> Binding and Reactivity on Transition Metals Underlying Hydrogenase Function and H<sub>2</sub> Production and Storage. *Chem. Rev.* **2007**, *107* (10), 4152–4205. <https://doi.org/10.1021/cr050197j>.
- (9) Bautista, M. T.; Earl, K. A.; Maltby, P. A.; Morris, R. H.; Schweitzer, C. T.; Sella, Andrea. Estimation of the Hydrogen-Hydrogen Distances of .Eta.2-Dihydrogen Ligands in the Complexes Trans-[M(.Eta.2-H<sub>2</sub>)(H)(PR<sub>2</sub>CH<sub>2</sub>CH<sub>2</sub>PR<sub>2</sub>)<sub>2</sub>]<sup>+</sup> [M = Iron, Ruthenium, R = Ph, M = Osmium, R = Et] by Solution NMR Methods. *J. Am. Chem. Soc.* **1988**, *110* (21), 7031–7036. <https://doi.org/10.1021/ja00229a015>.
- (10) Morris, R. H.; Wittebort, R. J. Effect of a Libration or Hopping Motion of the H<sub>2</sub>-Dihydrogen Ligand on Longitudinal Nuclear Magnetic Resonance Relaxation. *Magn. Reson. Chem.* **1997**, *35* (4), 243–250. [https://doi.org/10.1002/\(SICI\)1097-458X\(199704\)35:4<243::AID-OMR61>3.0.CO;2-S](https://doi.org/10.1002/(SICI)1097-458X(199704)35:4<243::AID-OMR61>3.0.CO;2-S).
- (11) Desrosiers, P. J.; Cai, L.; Lin, Z.; Richards, R.; Halpern, J. Assessment of the “T1 Criterion” for Distinguishing between Classical and Nonclassical Transition-Metal Hydrides: Hydride Relaxation Rates in Tris(Triarylphosphine)Osmium Tetrahydrides and Related Polyhydrides. *J. Am. Chem. Soc.* **1991**, *113* (11), 4173–4184. <https://doi.org/10.1021/ja00011a019>.
- (12) Cammarota, R. C.; Xie, J.; Burgess, S. A.; Vollmer, M. V.; Vogiatzis, K. D.; Ye, J.; Linehan, J. C.; Appel, A. M.; Hoffmann, C.; Wang, X.; Young, V. G.; Lu, C. C. Thermodynamic and Kinetic Studies of H<sub>2</sub> and N<sub>2</sub> Binding to Bimetallic Nickel-Group 13 Complexes and Neutron Structure of a Ni(H<sub>2</sub>-H<sub>2</sub>) Adduct. *Chem. Sci.* **2019**, *10* (29), 7029–7042. <https://doi.org/10.1039/C9SC02018G>.
- (13) Brunner, E. Solubility of Hydrogen in 10 Organic Solvents at 298.15, 323.15, and 373.15 K. *J. Chem. Eng. Data* **1985**, *30* (3), 269–273. <https://doi.org/10.1021/je00041a010>.
- (14) Burgess, D. IUPAC/NIST Solubility Data Series, NIST Standard Reference Database 106, 2007. <https://doi.org/10.18434/T4QC79>.

- (15) Wiedner, E. S.; Chambers, M. B.; Pitman, C. L.; Bullock, R. M.; Miller, A. J. M.; Appel, A. M. Thermodynamic Hydricity of Transition Metal Hydrides. *Chem. Rev.* **2016**, *116* (15), 8655–8692. <https://doi.org/10.1021/acs.chemrev.6b00168>.
- (16) Saame, J.; Rodima, T.; Tshepelevitsh, S.; Kütt, A.; Kaljurand, I.; Haljasorg, T.; Koppel, I. A.; Leito, I. Experimental Basicities of Superbasic Phosphonium Ylides and Phosphazenes. *J. Org. Chem.* **2016**, *81* (17), 7349–7361. <https://doi.org/10.1021/acs.joc.6b00872>.
- (17) Brereton, K. R.; Smith, N. E.; Hazari, N.; Miller, A. J. M. Thermodynamic and Kinetic Hydricity of Transition Metal Hydrides. *Chem. Soc. Rev.* **2020**, *49* (22), 7929–7948. <https://doi.org/10.1039/D0CS00405G>.
- (18) Wise, C. F.; Agarwal, R. G.; Mayer, J. M. Determining Proton-Coupled Standard Potentials and X–H Bond Dissociation Free Energies in Nonaqueous Solvents Using Open-Circuit Potential Measurements. *J. Am. Chem. Soc.* **2020**, *142* (24), 10681–10691. <https://doi.org/10.1021/jacs.0c01032>.
- (19) Mock, M. T.; Potter, R. G.; Camaioni, D. M.; Li, J.; Dougherty, W. G.; Kassel, W. S.; Twamley, B.; DuBois, D. L. Thermodynamic Studies and Hydride Transfer Reactions from a Rhodium Complex to BX<sub>3</sub> Compounds. *J. Am. Chem. Soc.* **2009**, *131* (40), 14454–14465. <https://doi.org/10.1021/ja905287q>.
- (20) Crestani, M. G.; Muñoz-Hernández, M.; Arévalo, A.; Acosta-Ramírez, A.; García, J. J.  $\sigma$ -Borane Coordinated to Nickel(0) and Some Related Nickel(II) Trihydride Complexes. *J. Am. Chem. Soc.* **2005**, *127* (51), 18066–18073. <https://doi.org/10.1021/ja056000m>.
- (21) Brown, H. C.; Kramer, G. W.; Hubbard, J. L.; Krishnamurthy, S. Addition Compounds of Alkali Metal Hydrides. *J. Organomet. Chem.* **1980**, *188* (1), 1–10. [https://doi.org/10.1016/S0022-328X\(00\)83693-1](https://doi.org/10.1016/S0022-328X(00)83693-1).
- (22) Cammarota, R. C. Greater than the Sum of Its Parts: Tuning Nickel for Uncommon Small Molecule Reactivity and Catalysis via Dative Bonds with Group 13 Lewis Acidic Metalloligands, University of Minnesota, Minneapolis, Minnesota, U.S.A., 2018.
- (23) Vollmer, M. V. Exploring Small Molecule Reactivity with Low-Valent Nickel and Cobalt Complexes Supported by Lewis Acidic Metalloligands, University of Minnesota, Minneapolis, Minnesota, U.S.A., 2019.
- (24) Vollmer, M. V.; Ye, J.; Linehan, J. C.; Graziano, B. J.; Preston, A.; Wiedner, E. S.; Lu, C. C. Cobalt-Group 13 Complexes Catalyze CO<sub>2</sub> Hydrogenation via a Co(–I)/Co(I) Redox Cycle. *ACS Catal.* **2020**, *10* (4), 2459–2470. <https://doi.org/10.1021/acscatal.9b03534>.
- (25) Heiden, Z. M.; Lathem, A. P. Establishing the Hydride Donor Abilities of Main Group Hydrides. *Organometallics* **2015**, *34* (10), 1818–1827. <https://doi.org/10/f7fh7b>.
- (26) Yang, L.; Powell, D. R.; Houser, R. P. Structural Variation in Copper(I) Complexes with Pyridylmethylamide Ligands: Structural Analysis with a New Four-Coordinate Geometry Index, T4. *Dalton Trans.* **2007**, No. 9, 955–964. <https://doi.org/10.1039/B617136B>.
- (27) Rosiak, D.; Okuniewski, A.; Chojnacki, J. Novel Complexes Possessing Hg–(Cl, Br, I)···OC Halogen Bonding and Unusual Hg<sub>2</sub>S<sub>2</sub>(Br/I)<sub>4</sub> Kernel. The Usefulness of T4' Structural Parameter. *Polyhedron* **2018**, *146*, 35–41. <https://doi.org/10.1016/j.poly.2018.02.016>.
- (28) Okuniewski, A.; Rosiak, D.; Chojnacki, J.; Becker, B. Coordination Polymers and Molecular Structures among Complexes of Mercury(II) Halides with Selected 1-Benzoylthioureas. *Polyhedron* **2015**, *90*, 47–57. <https://doi.org/10.1016/j.poly.2015.01.035>.
- (29) M. J. Frisch, G. W. Trucks, H. B. Schlegel, G. E. Scuseria, M. A. Robb, J. R. Cheeseman, G. Scalmani, V. Barone, G. A. Petersson, H. Nakatsuji, X. Li, M. Caricato, A. Marenich, J.

- Bloino, B. G. Janesko, R. Gomperts, B. Mennucci, H. P. Hratchian, J. V. Ortiz, A. F. Izmaylov, J. L. Sonnenberg, D. Williams-Young, F. Ding, F. Lipparini, F. Egidi, J. Goings, B. Peng, A. Petrone, T. Henderson, D. Ranasinghe, V. G. Zakrzewski, J. Gao, N. Rega, G. Zheng, W. Liang, M. Hada, M. Ehara, K. Toyota, R. Fukuda, J. Hasegawa, M. Ishida, T. Nakajima, Y. Honda, O. Kitao, H. Nakai, T. Vreven, K. Throssell, J. A. Montgomery, Jr., J. E. Peralta, F. Ogliaro, M. Bearpark, J. J. Heyd, E. Brothers, K. N. Kudin, V. N. Staroverov, T. Keith, R. Kobayashi, J. Normand, K. Raghavachari, A. Rendell, J. C. Burant, S. S. Iyengar, J. Tomasi, M. Cossi, J. M. Millam, M. Klene, C. Adamo, R. Cammi, J. W. Ochterski, R. L. Martin, K. Morokuma, O. Farkas, J. B. Foresman, and D. J. Fox. *Gaussian 09, Revision A.02*; Gaussian, Inc.: Wallingford CT, 2016.
- (30) Weigend, F.; Ahlrichs, R. Balanced Basis Sets of Split Valence, Triple Zeta Valence and Quadruple Zeta Valence Quality for H to Rn: Design and Assessment of Accuracy. *Phys. Chem. Chem. Phys.* **2005**, *7* (18), 3297–3305. <https://doi.org/10.1039/B508541A>.
- (31) Zhao, Y.; Truhlar, D. G. A New Local Density Functional for Main-Group Thermochemistry, Transition Metal Bonding, Thermochemical Kinetics, and Noncovalent Interactions. *J. Chem. Phys.* **2006**, *125* (19), 194101. <https://doi.org/10.1063/1.2370993>.
- (32) *Chemcraft - Graphical Software for Visualization of Quantum Chemistry Computations*. <https://www.chemcraftprog.com>.
